# Supplementary material for: Global Analysis of Arabidopsis/Downy Mildew Interactions Reveals Prevalence of Incomplete Resistance and Rapid Evolution of Pathogen Recognition
Source: PubMed Central journal article supplement (PMC3237489; doi:10.1371/journal.pone.0028765), 2011-12-14

# Supplemental Dataset 1. *Hpa* Emoy2

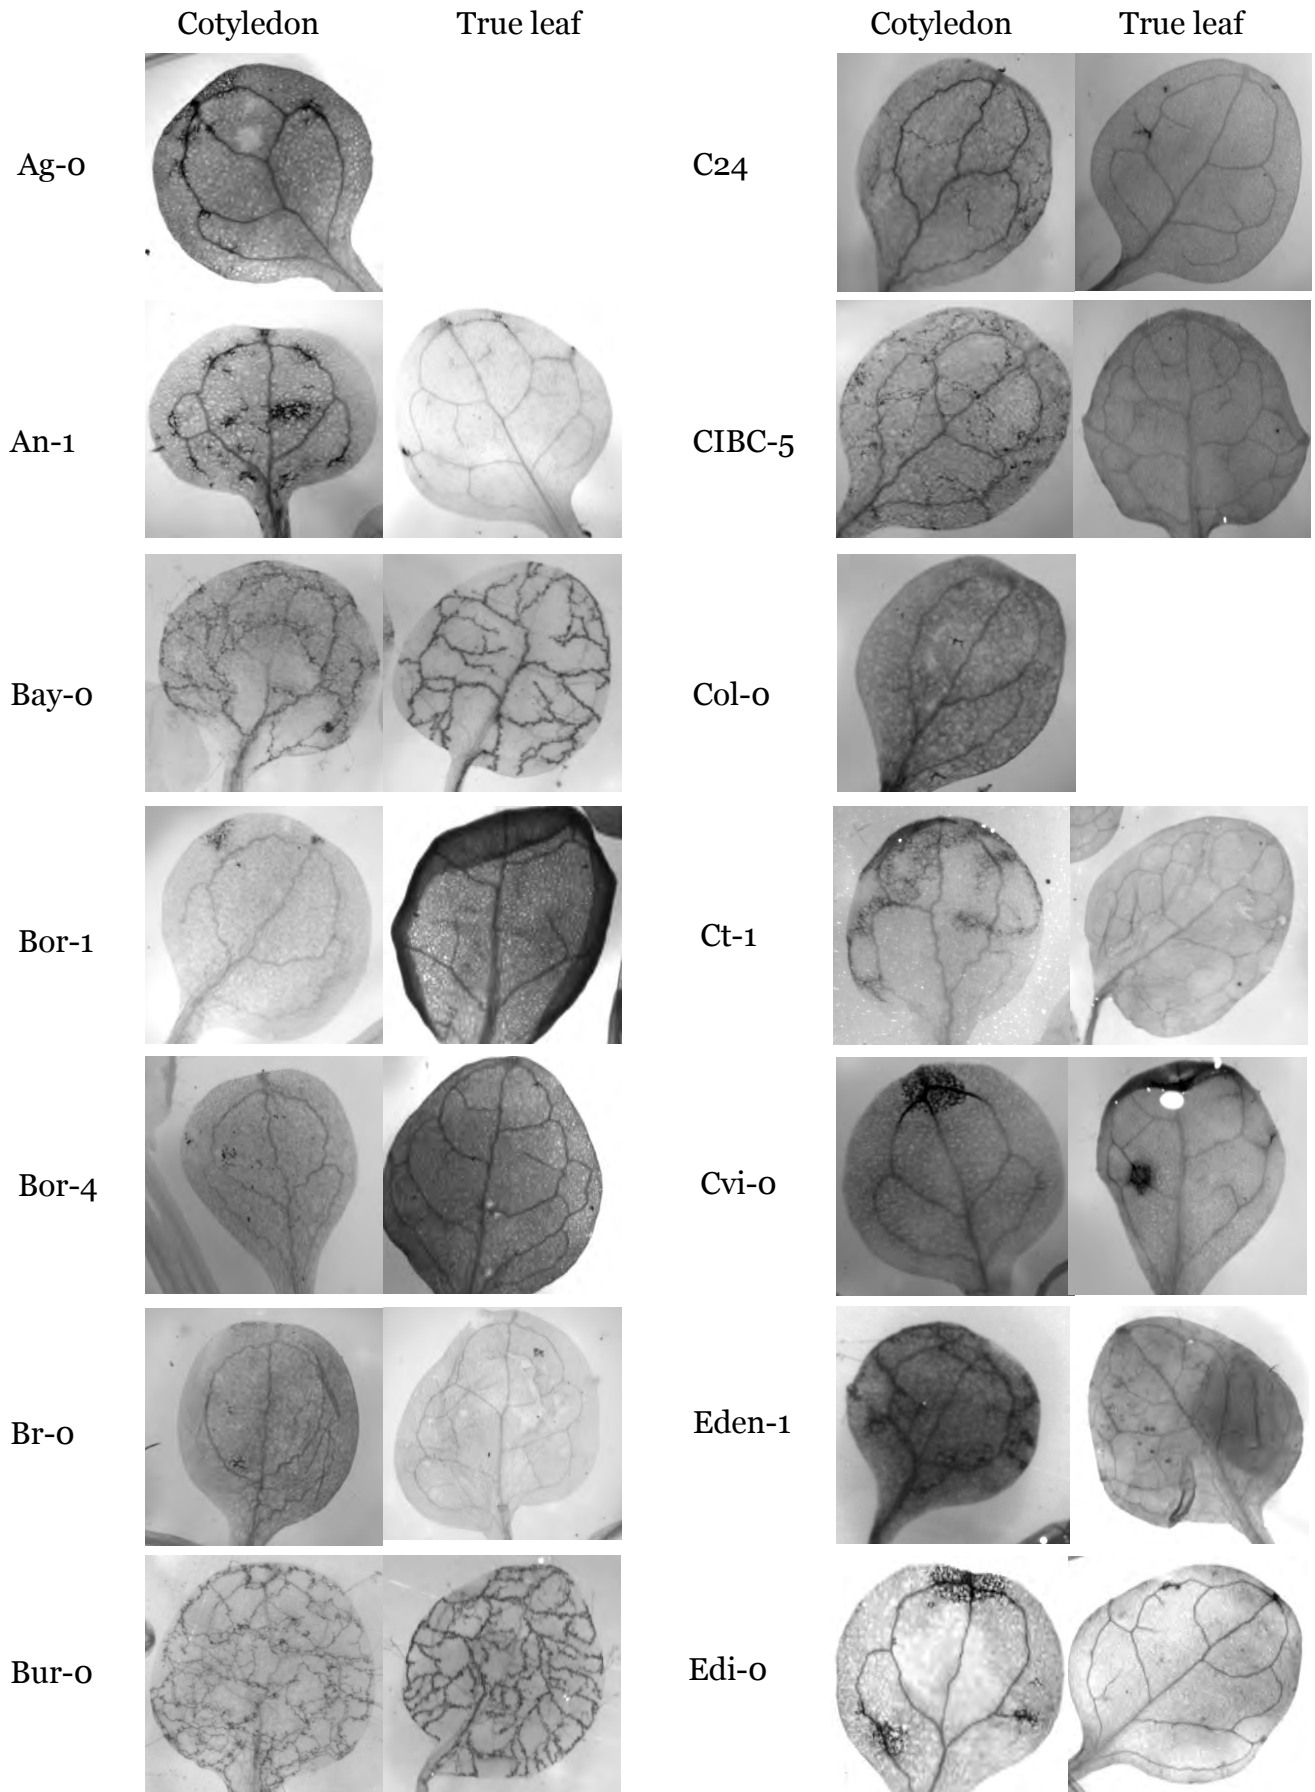

**Supplemental Dataset 1. *Hpa* Emoy2**

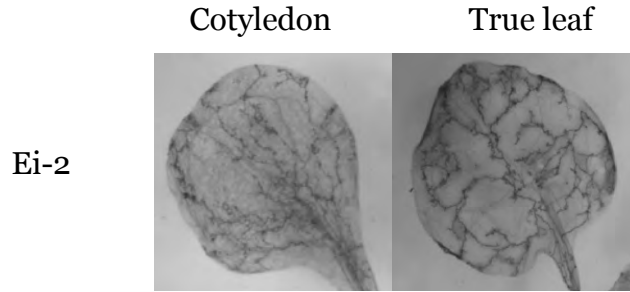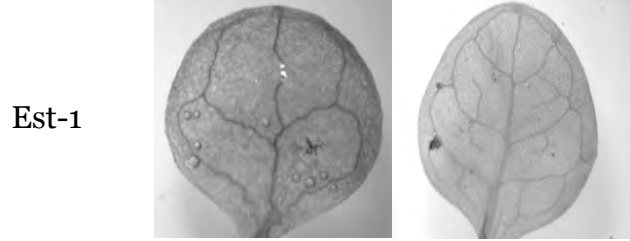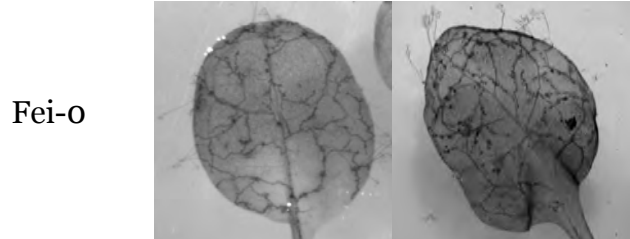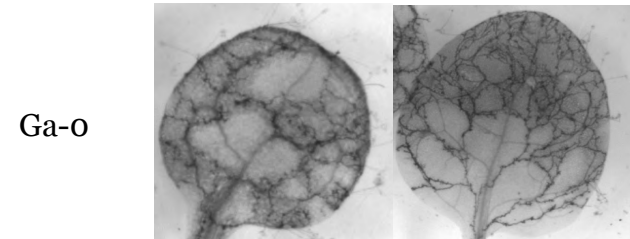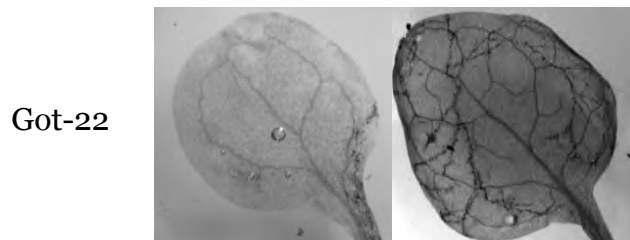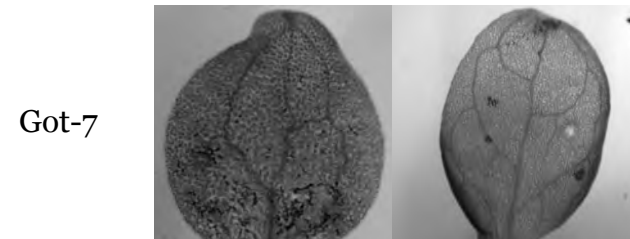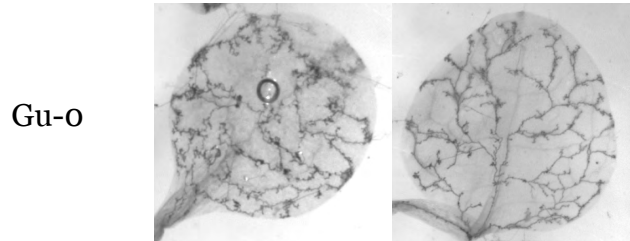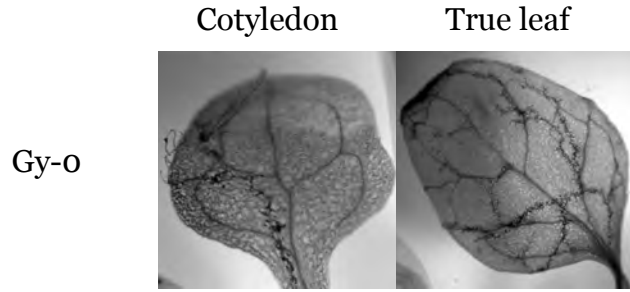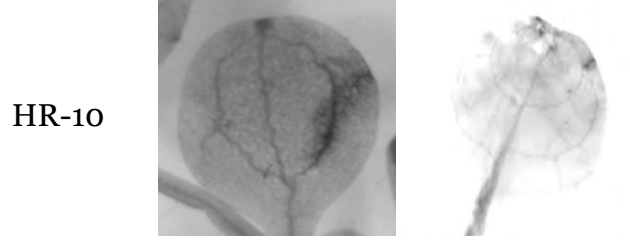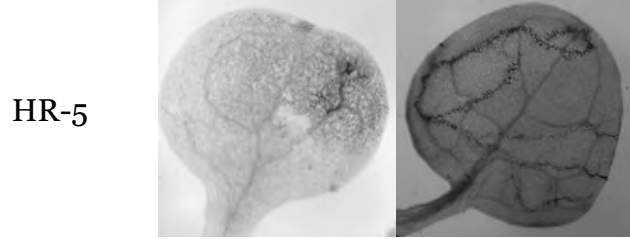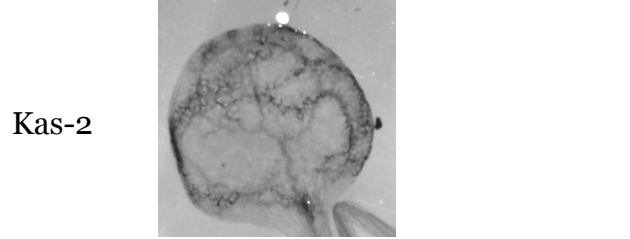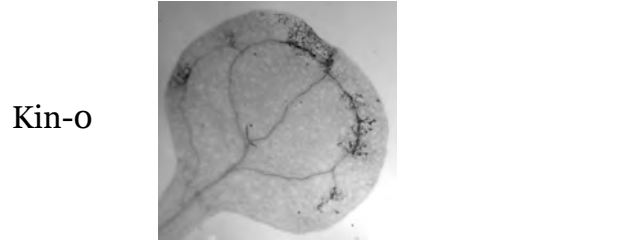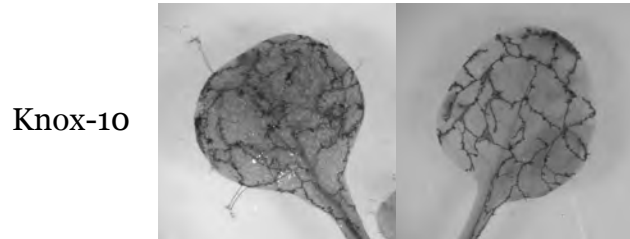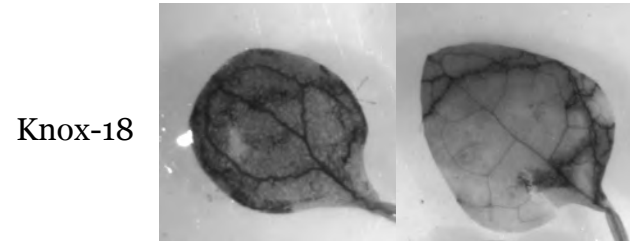

**Supplemental Dataset 1. *Hpa* Emoy2**

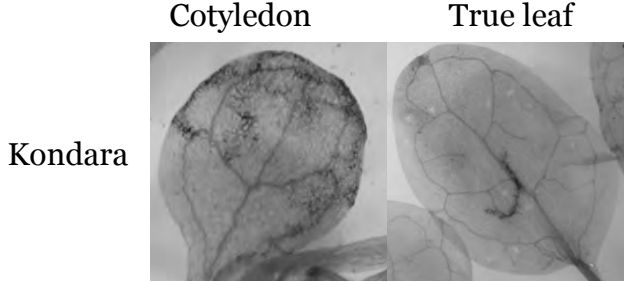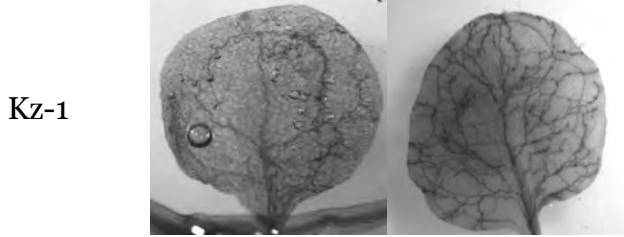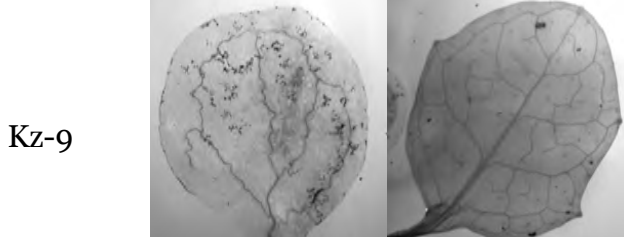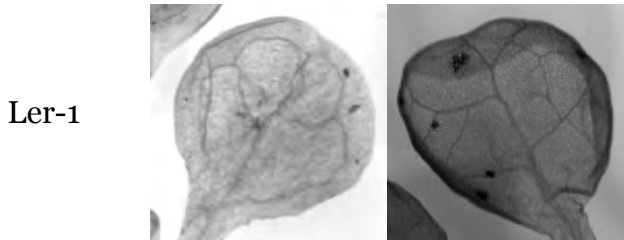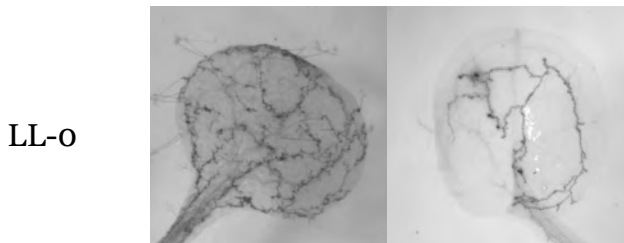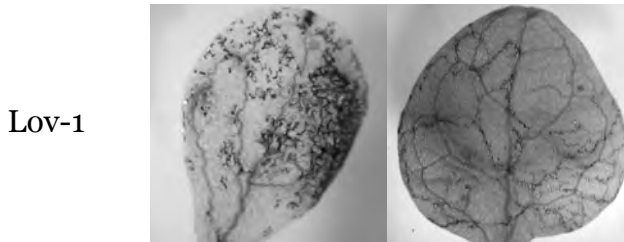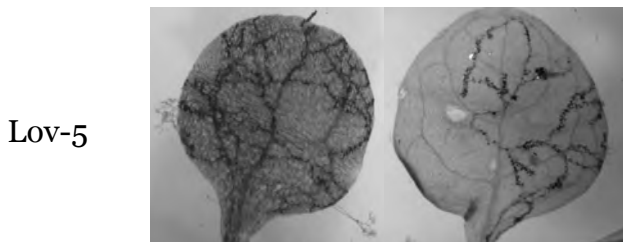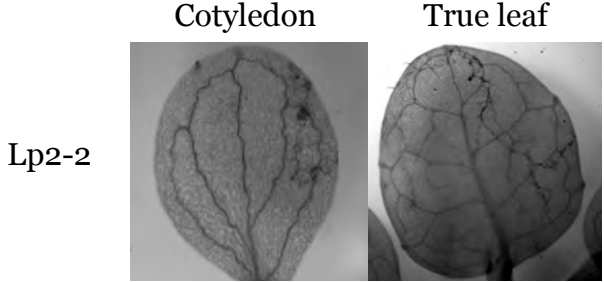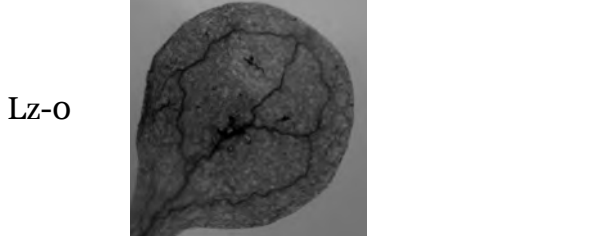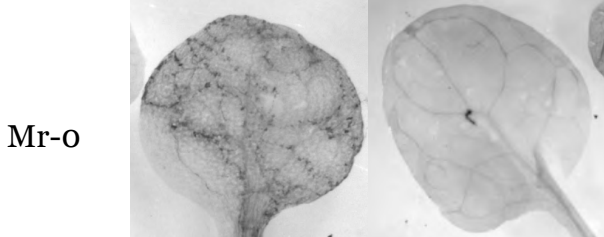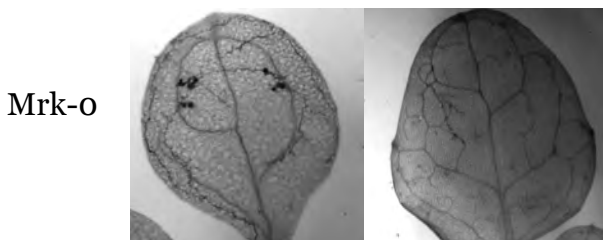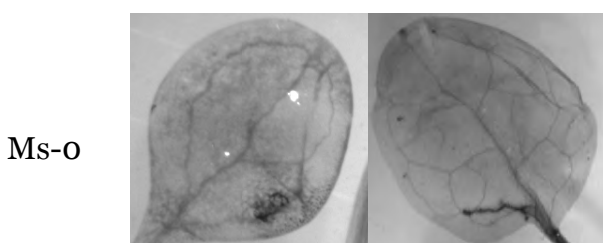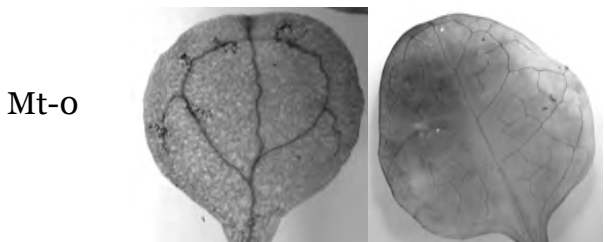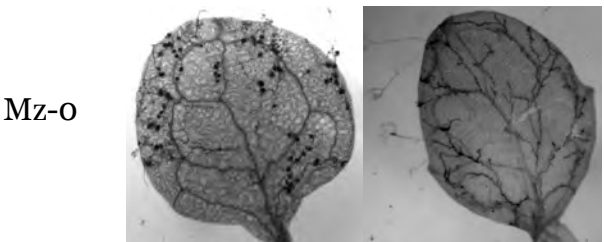

**Supplemental Dataset 1. *Hpa* Emoy2**

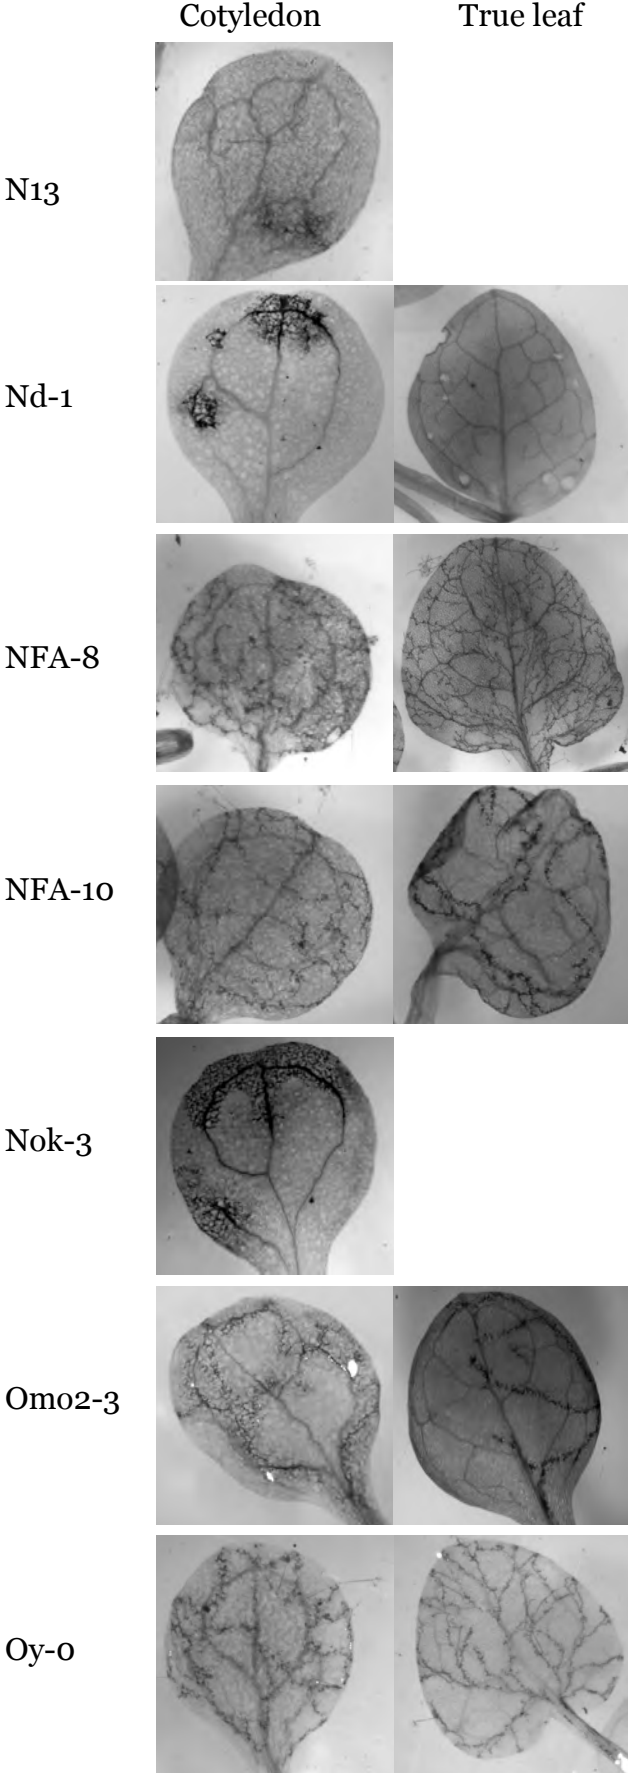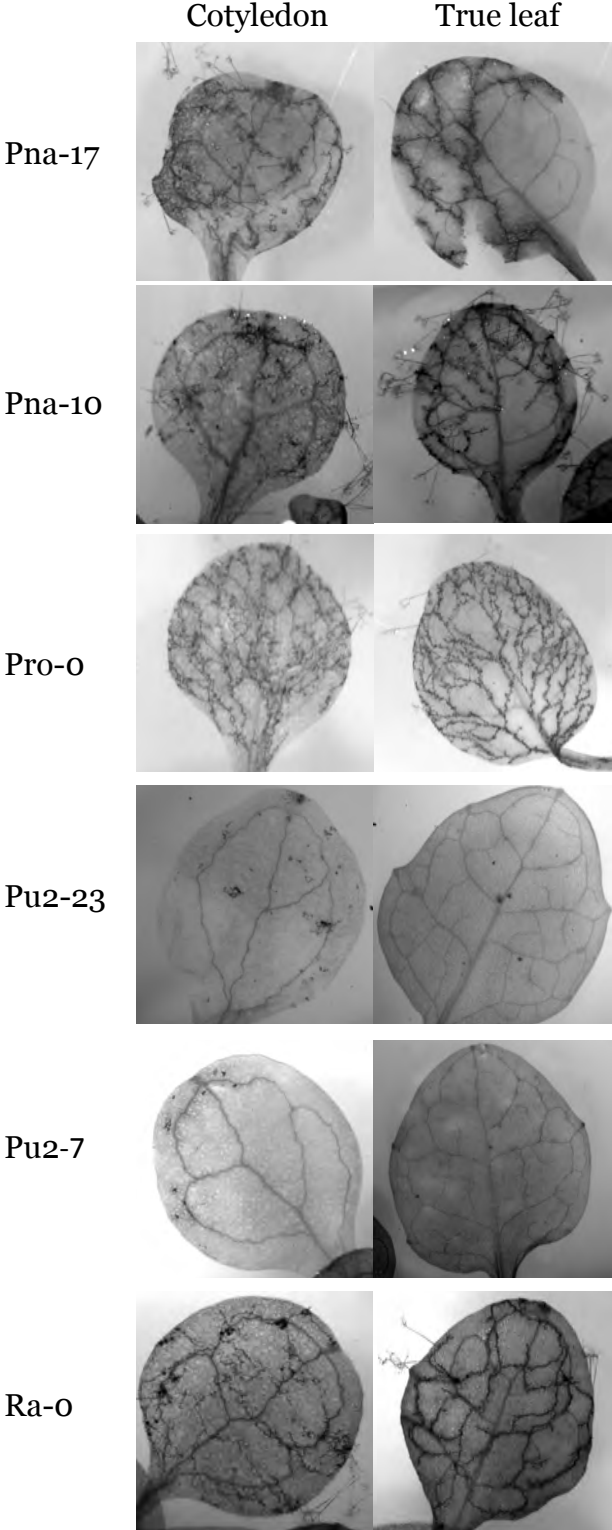

# Supplemental Dataset 1. *Hpa* Emoy2

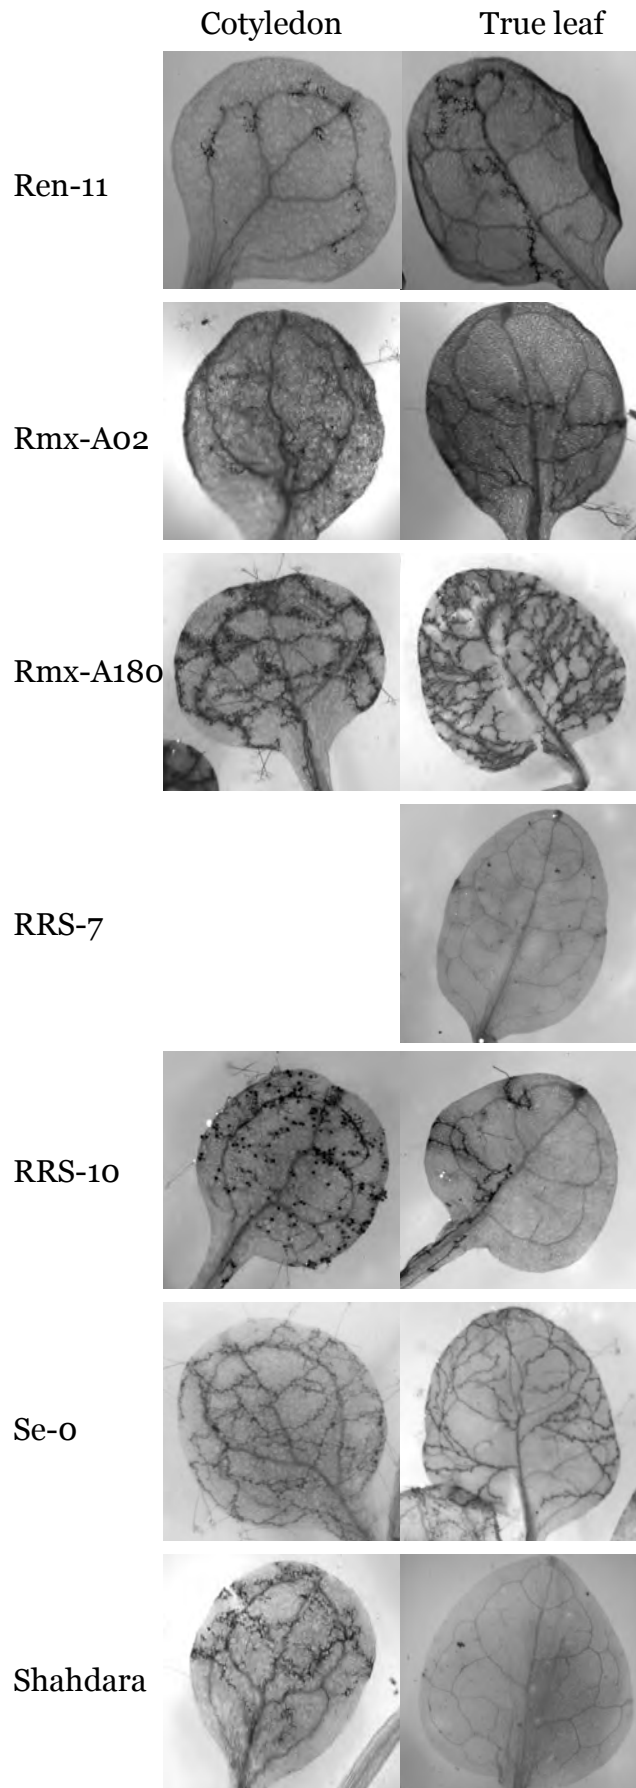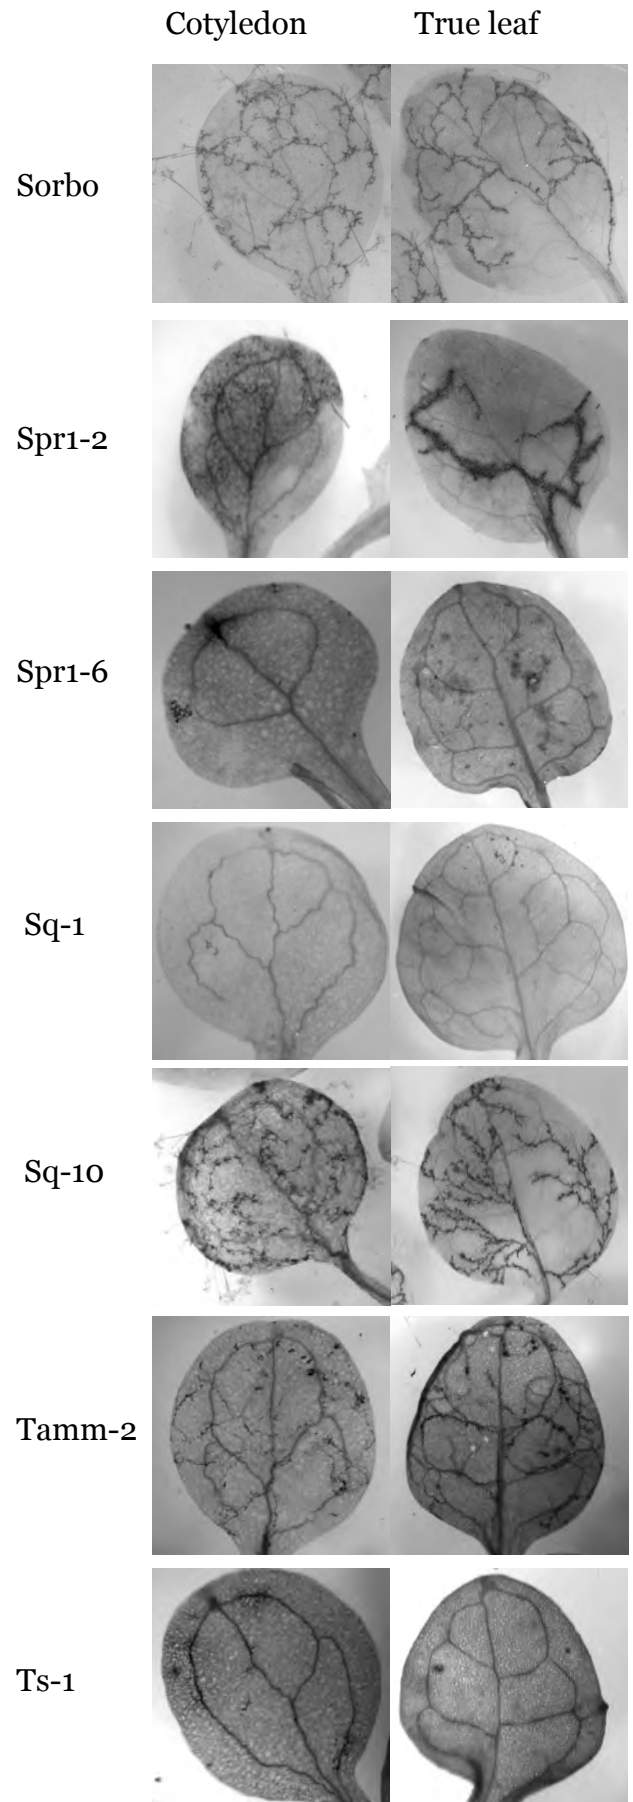

# Supplemental Dataset 1. *Hpa* Emoy2

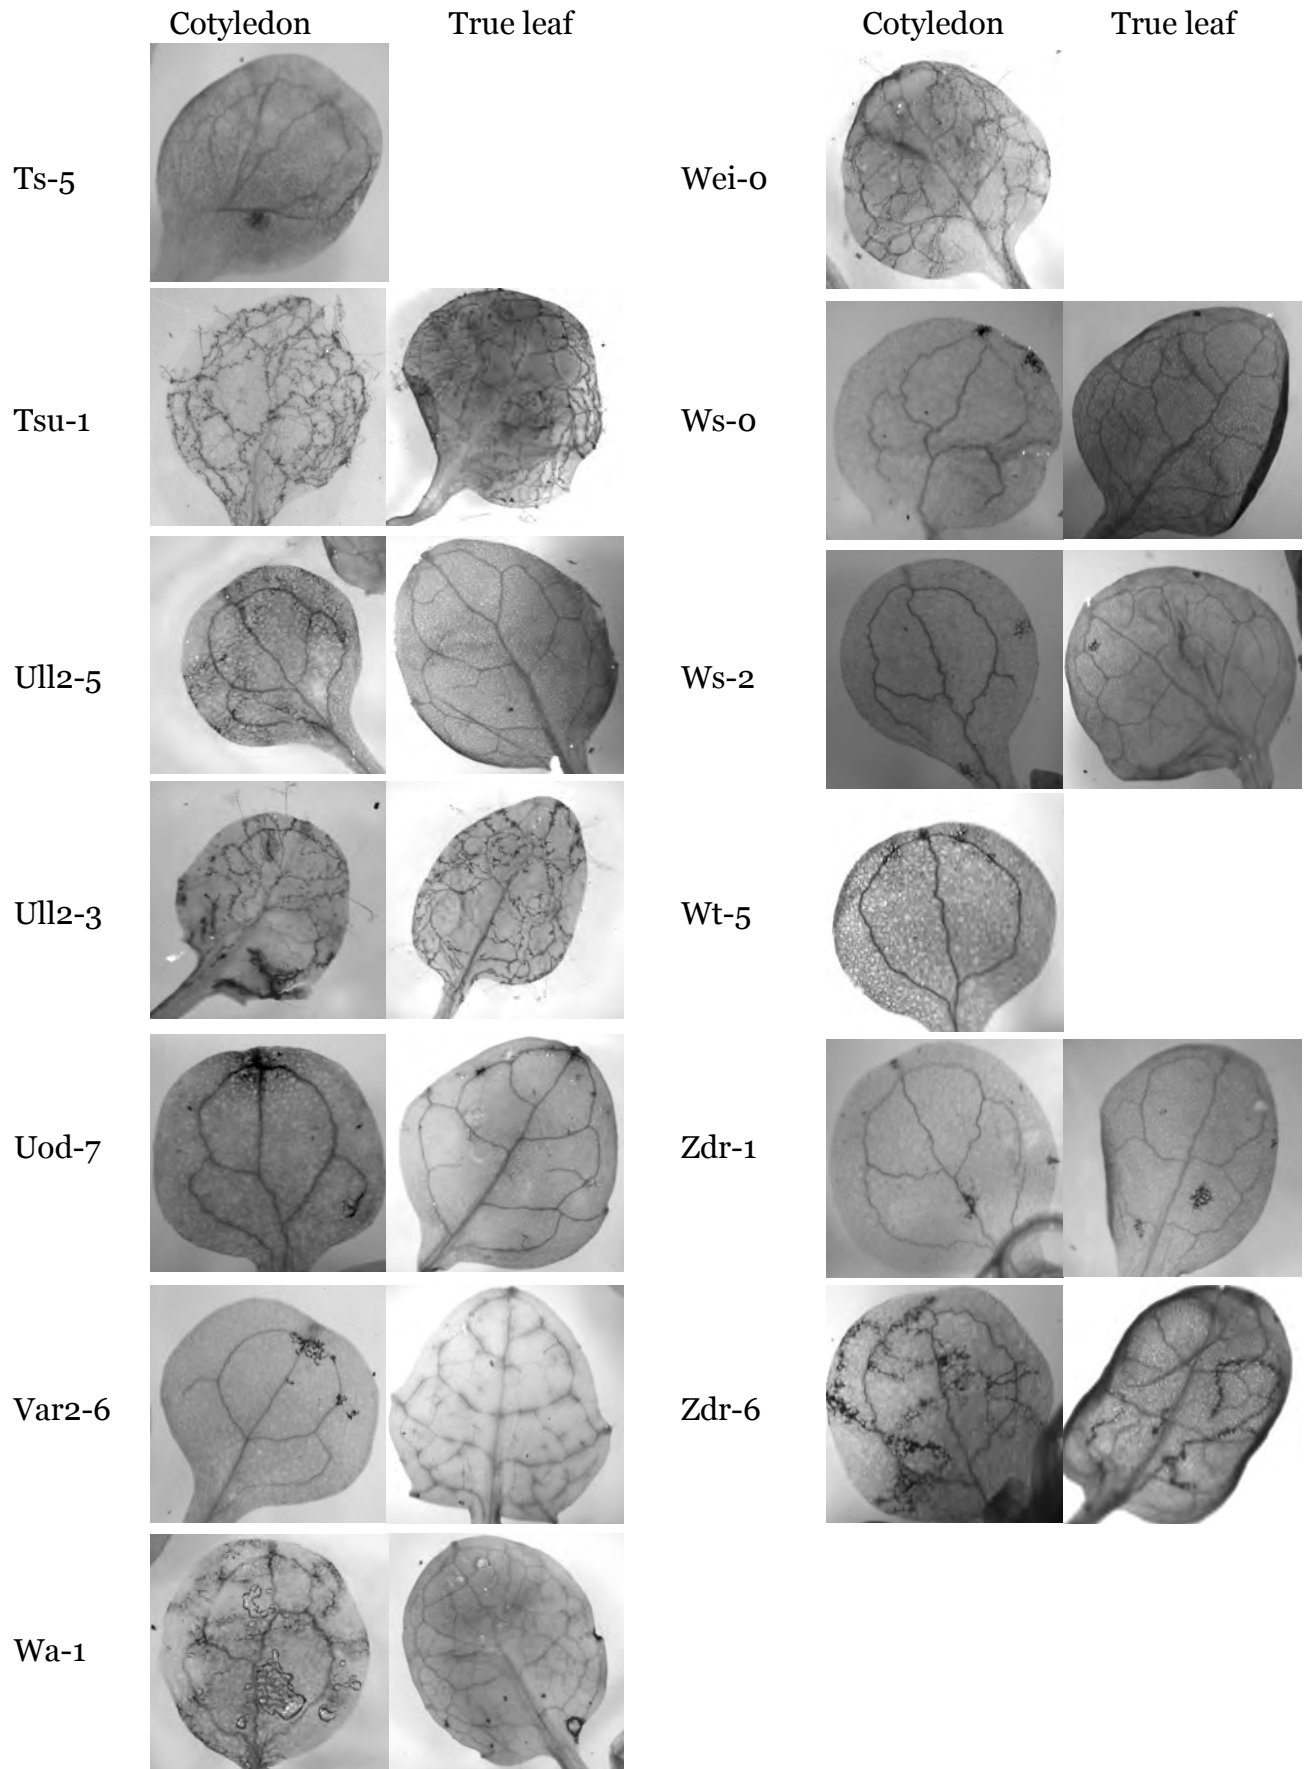

Supplement: pone.0028765.s004.pdf [file pone.0028765.s004.pdf]
