# Supplementary material for: Global Analysis of Arabidopsis/Downy Mildew Interactions Reveals Prevalence of Incomplete Resistance and Rapid Evolution of Pathogen Recognition
Source: PubMed Central journal article supplement (PMC3237489; doi:10.1371/journal.pone.0028765), 2011-12-14

## Supplemental Dataset 2. *Hpa* Maks9

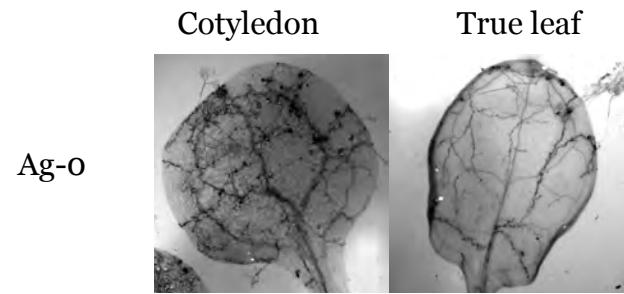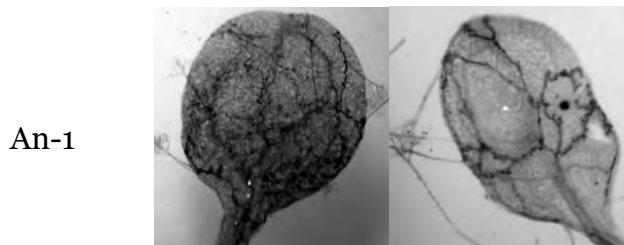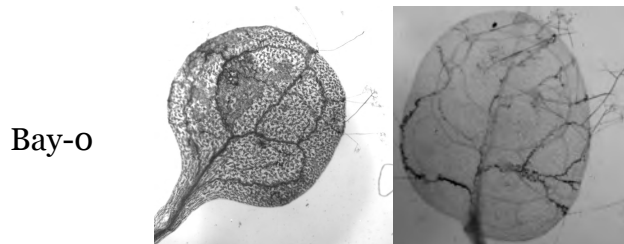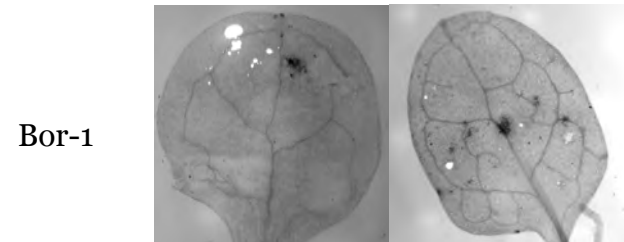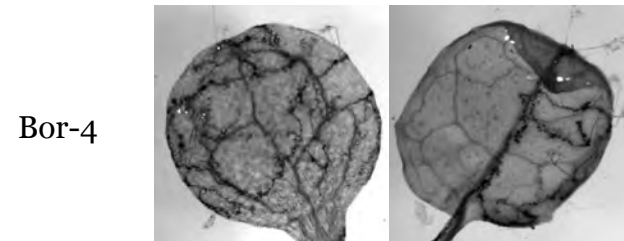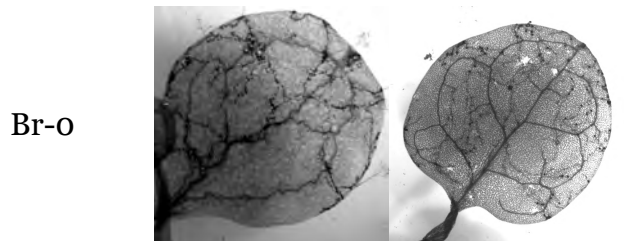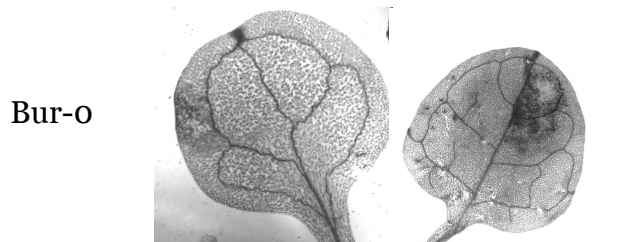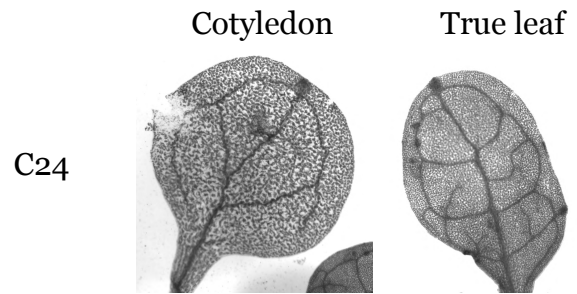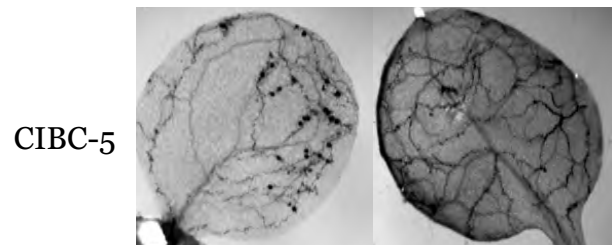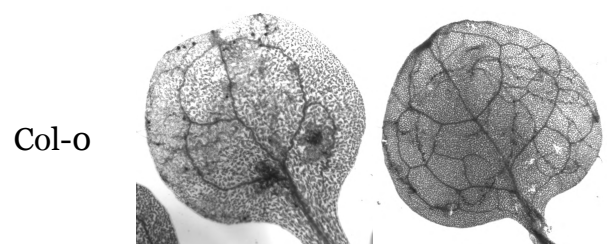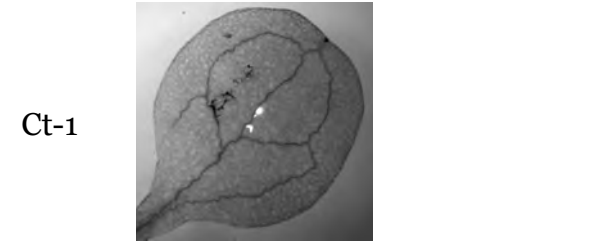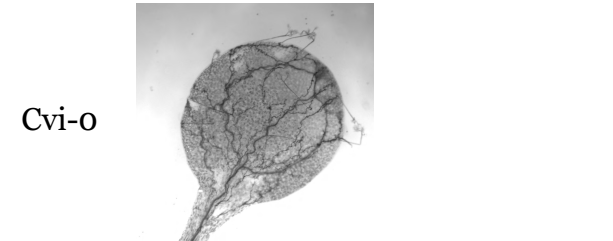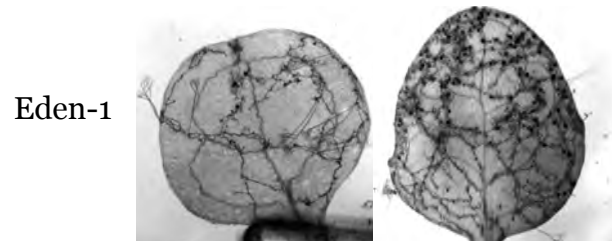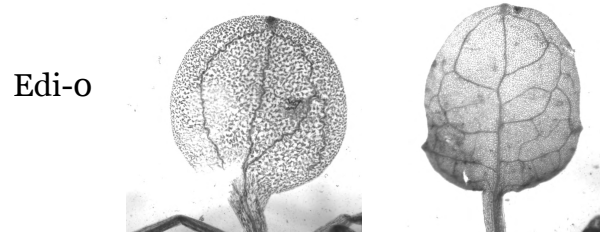

## Supplemental Dataset 2. *Hpa* Maks9

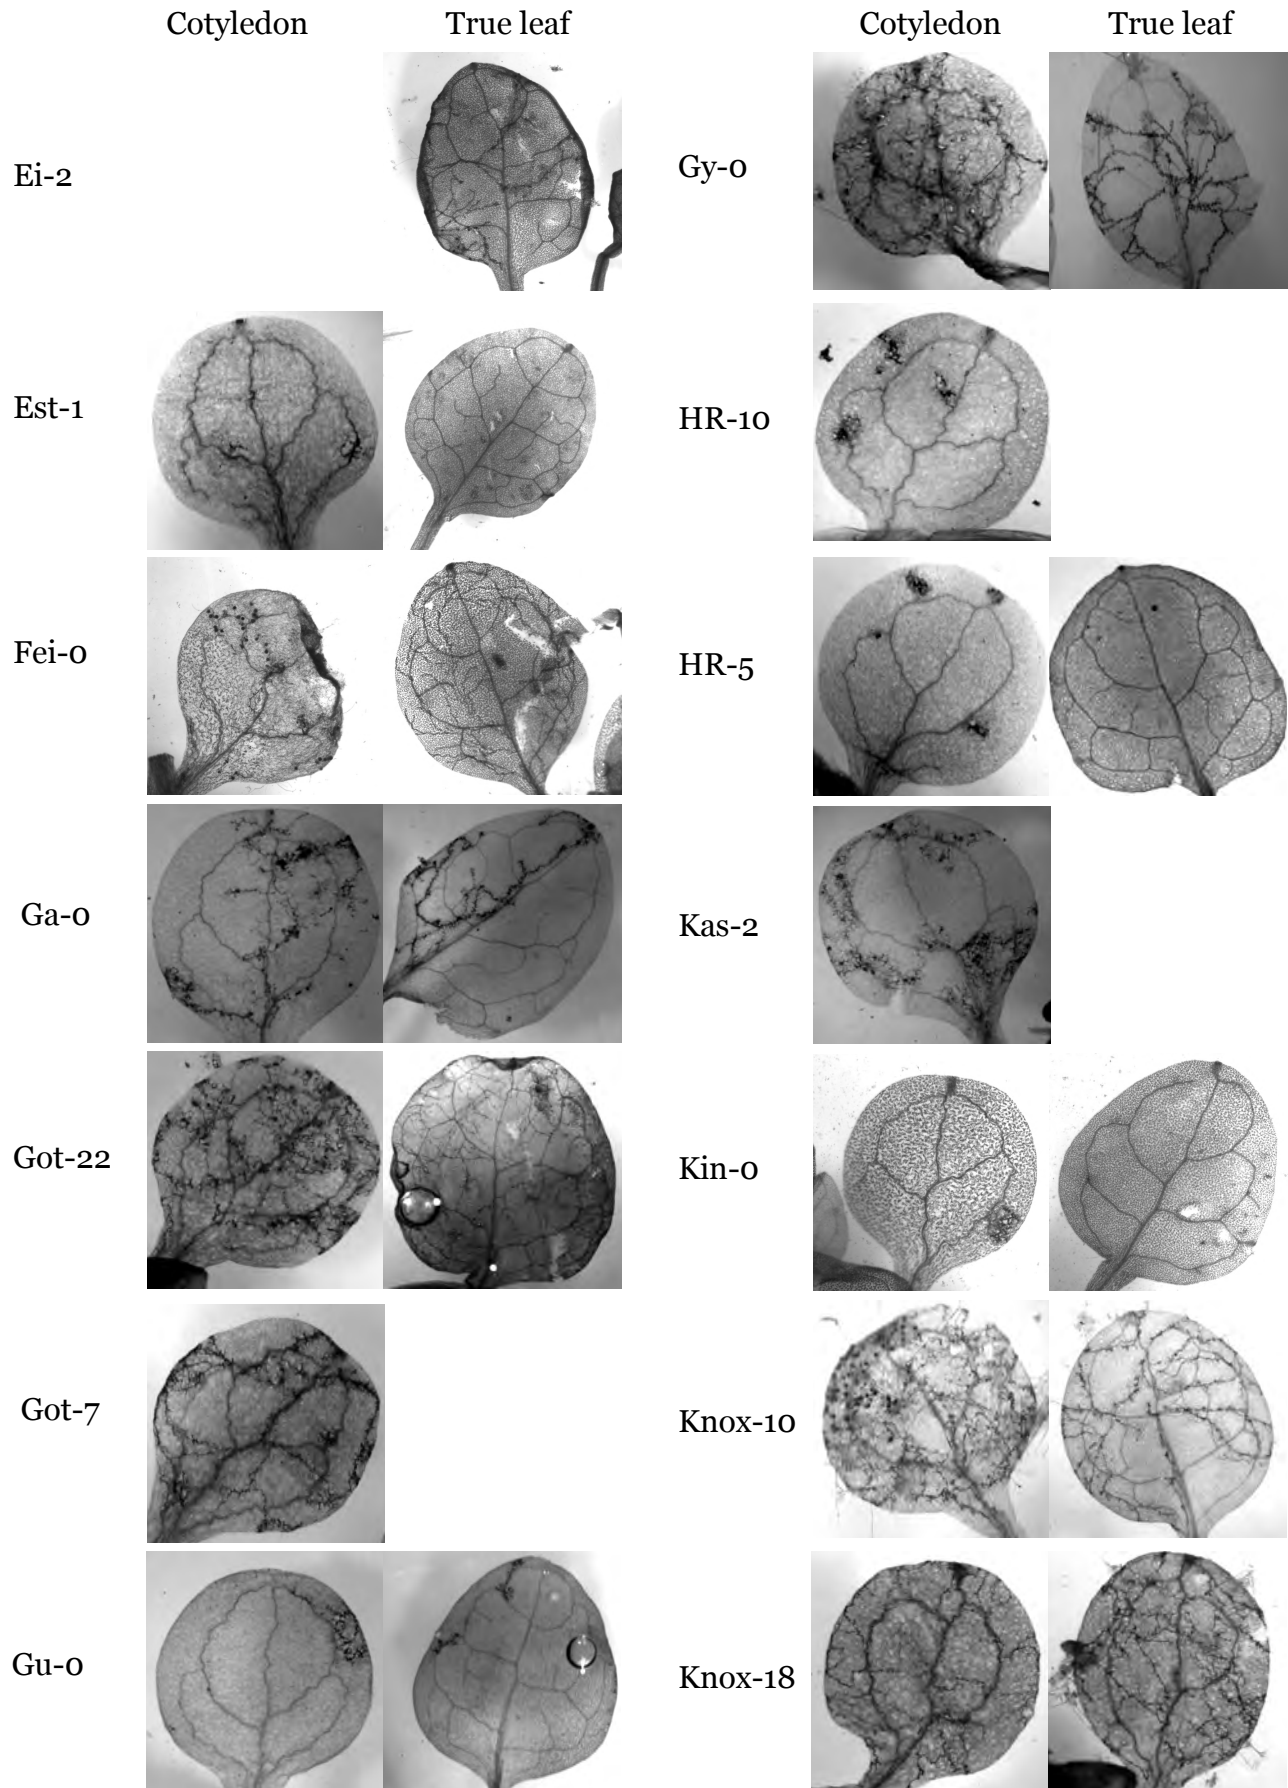

**Supplemental Dataset 2. *Hpa* Maks9**

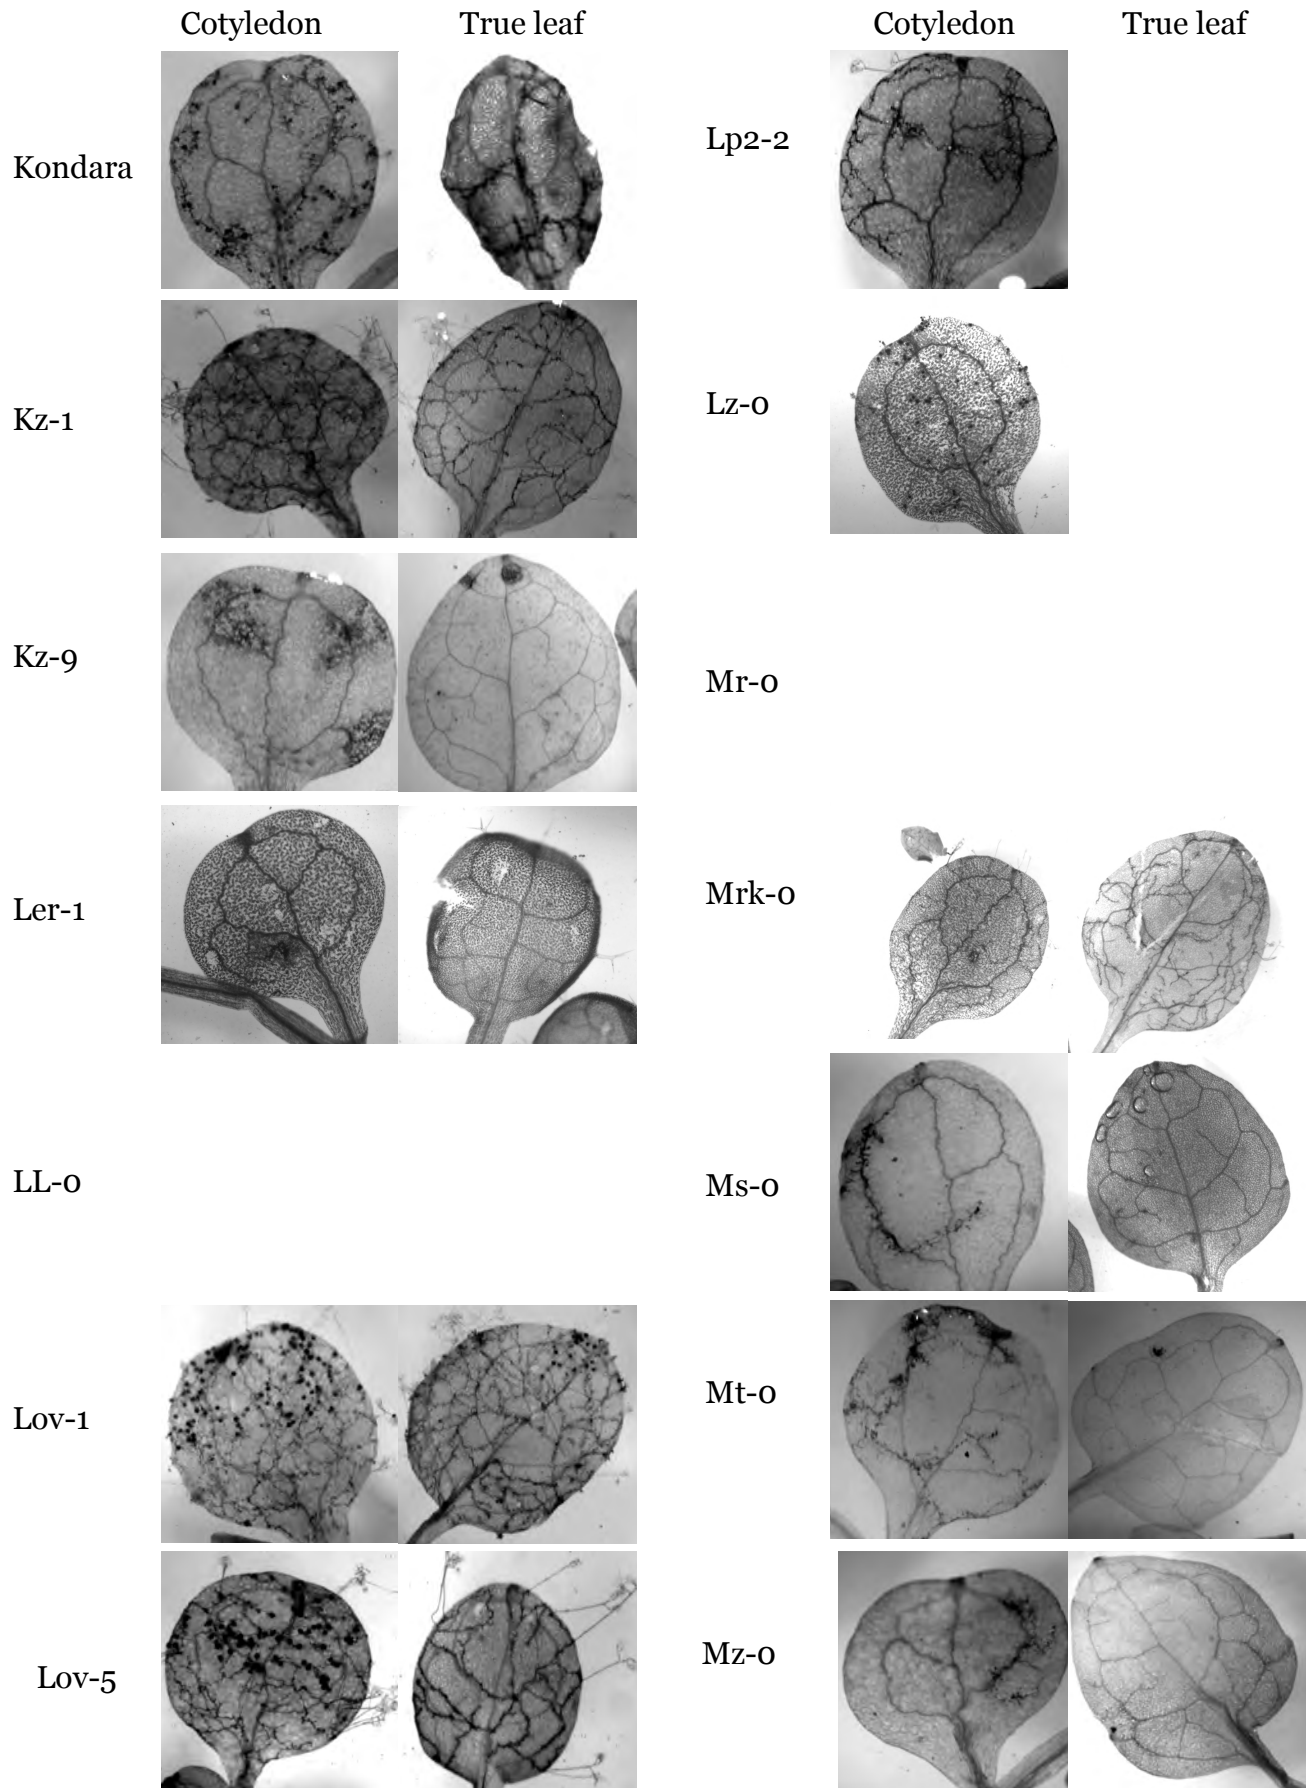

**Supplemental Dataset 2. *Hpa* Maks9**

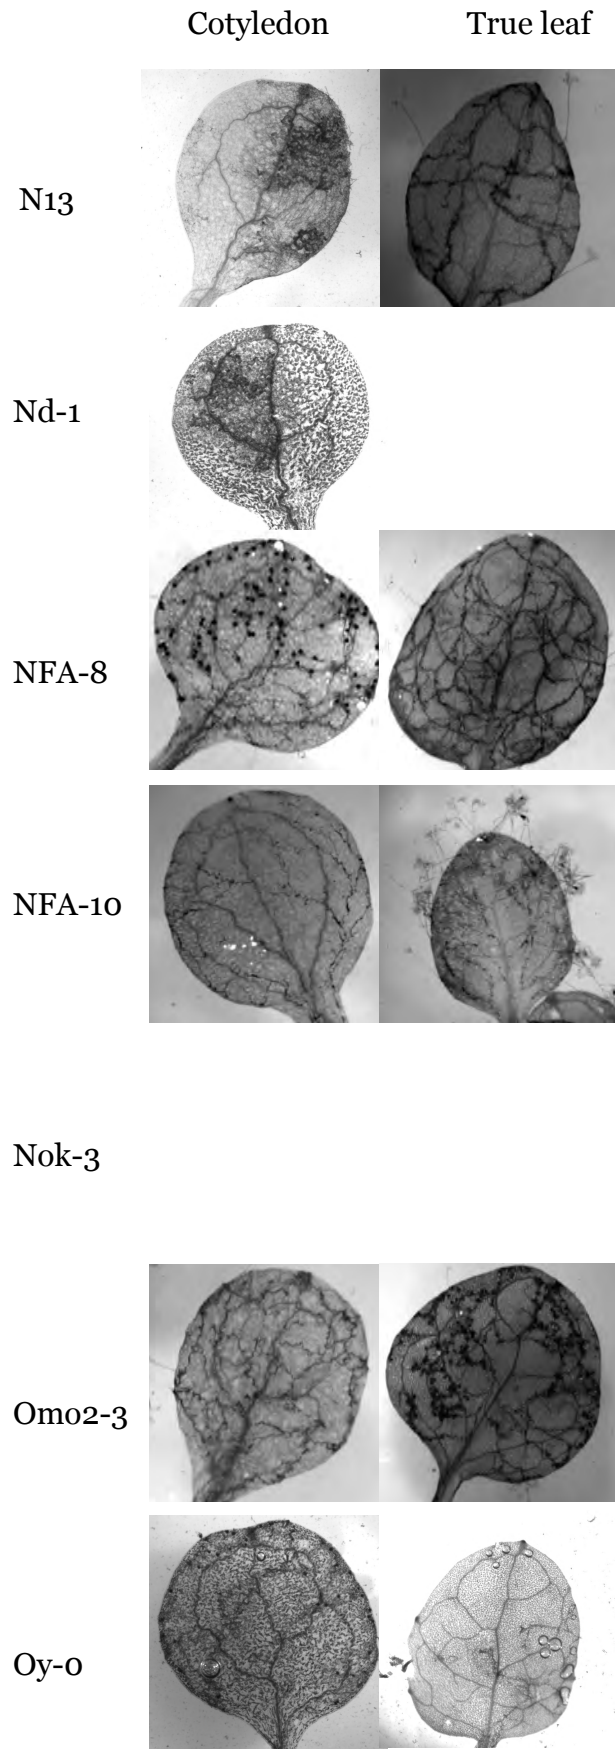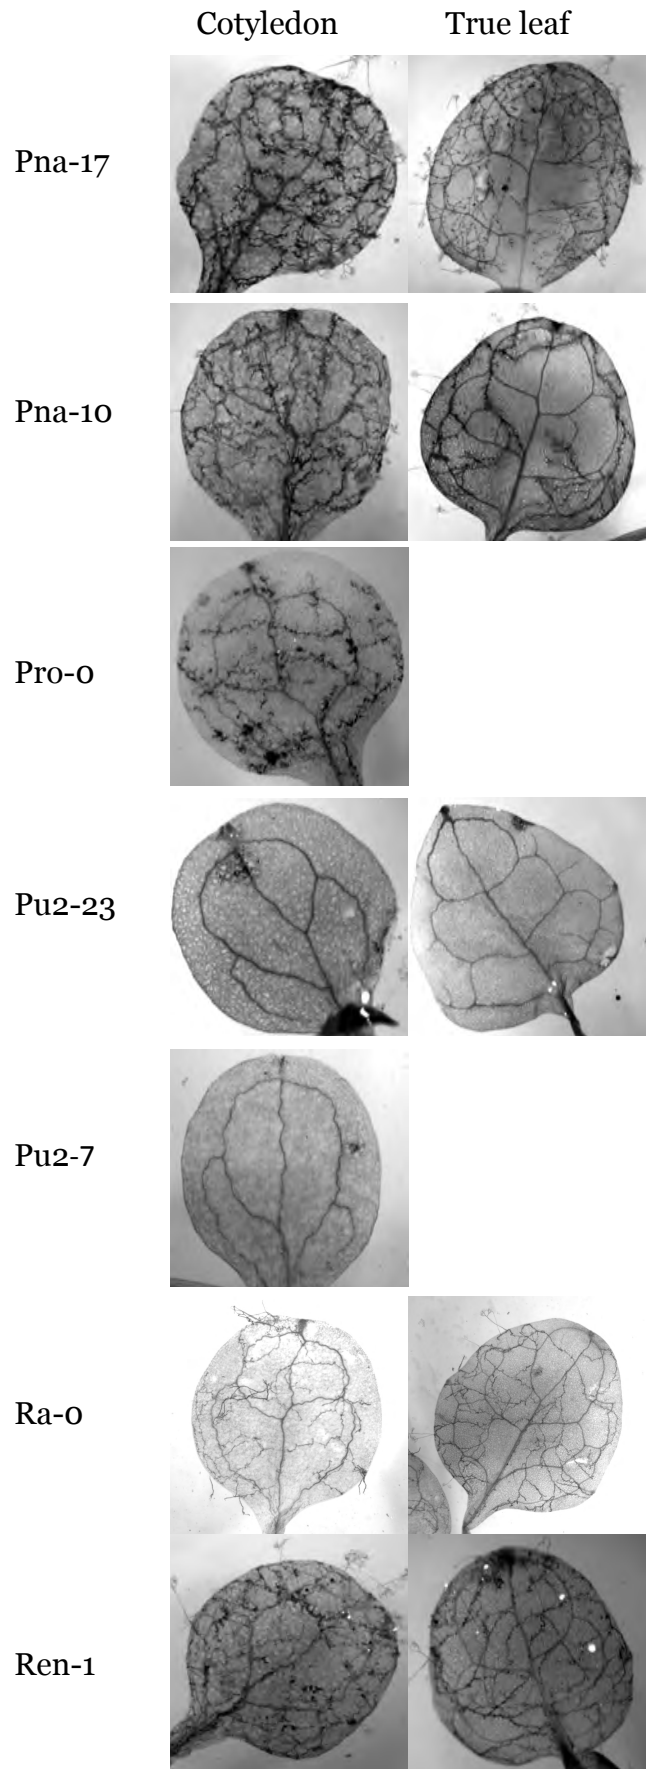

## Supplemental Dataset 2. *Hpa* Maks9

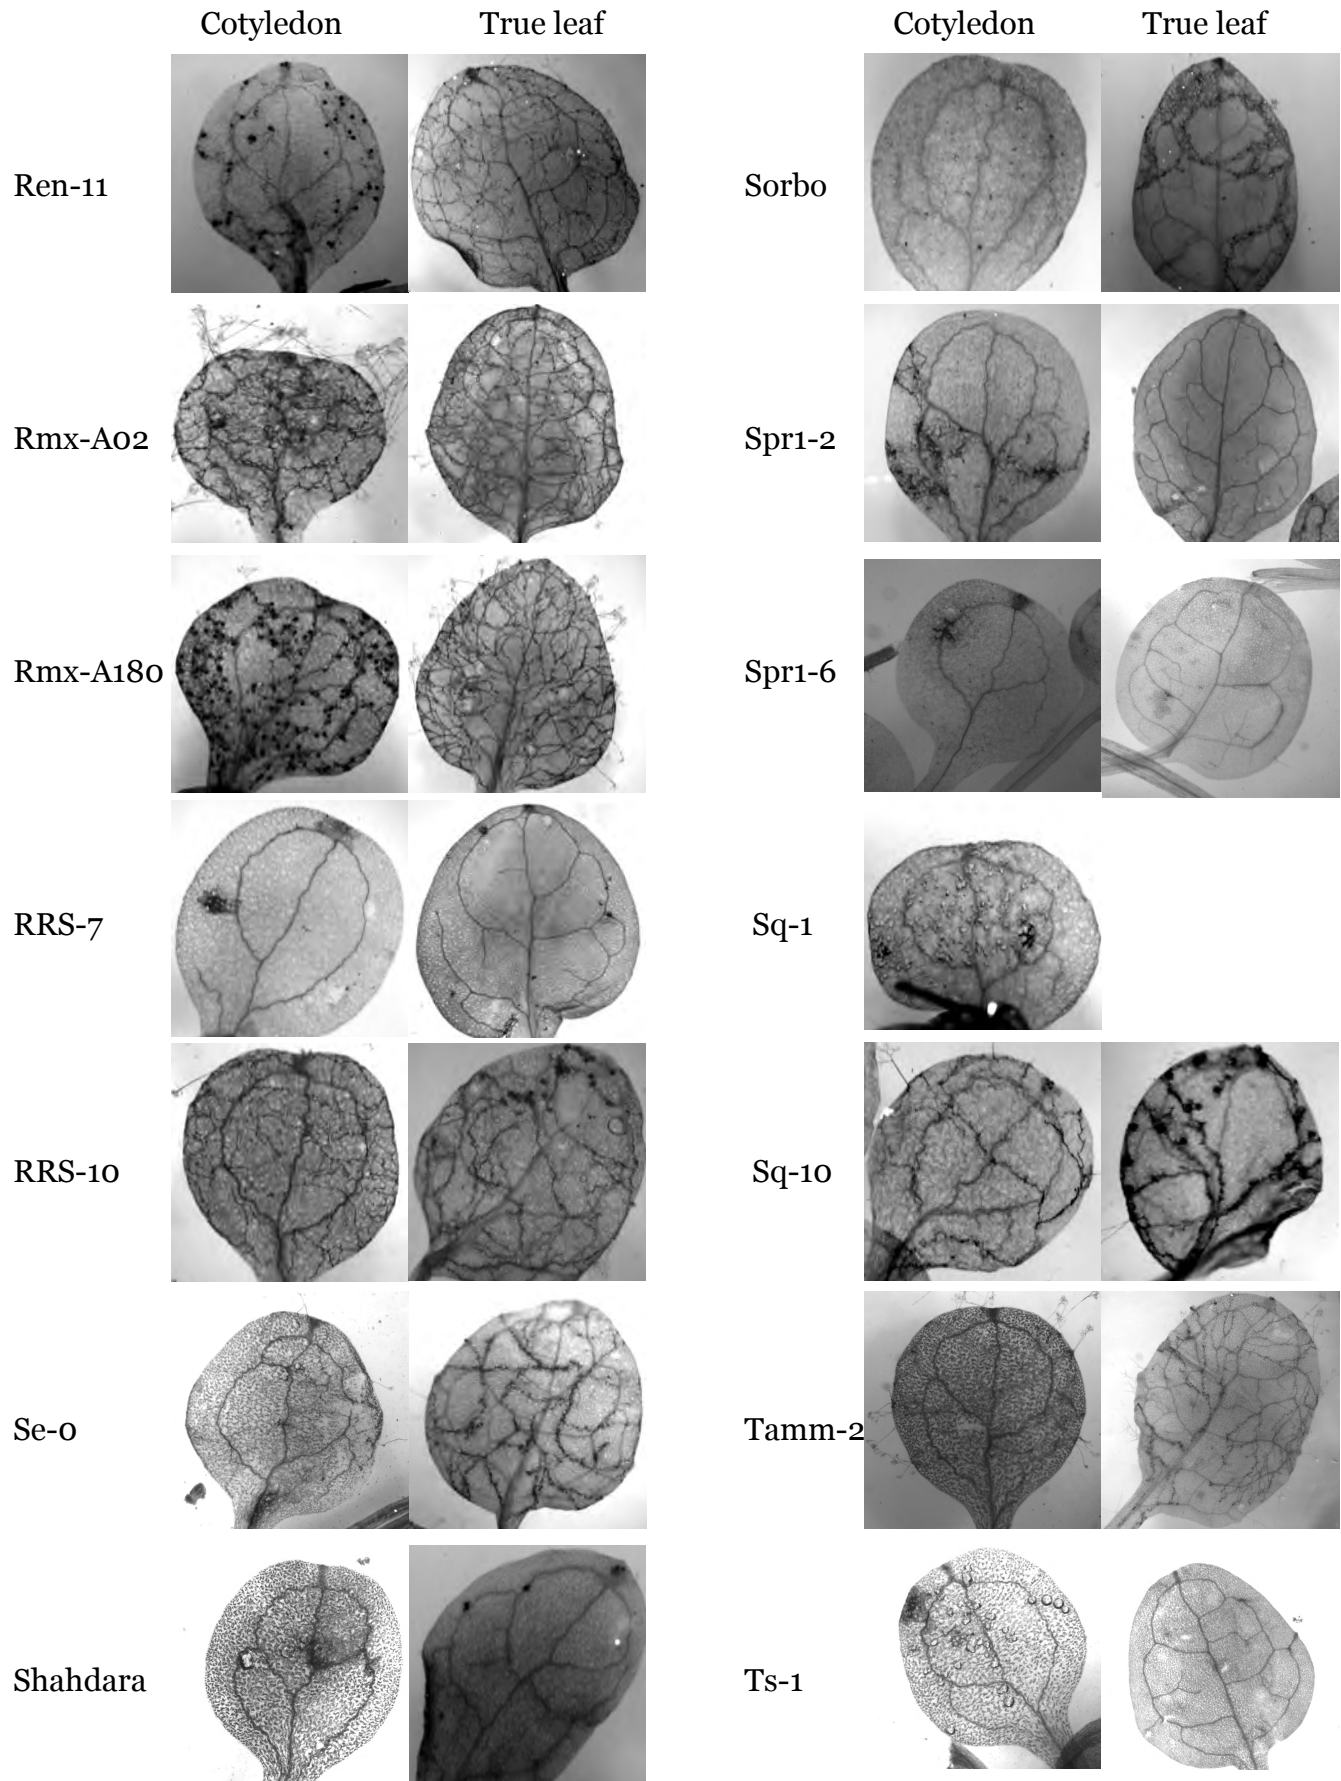

## Supplemental Dataset 2. *Hpa* Maks9

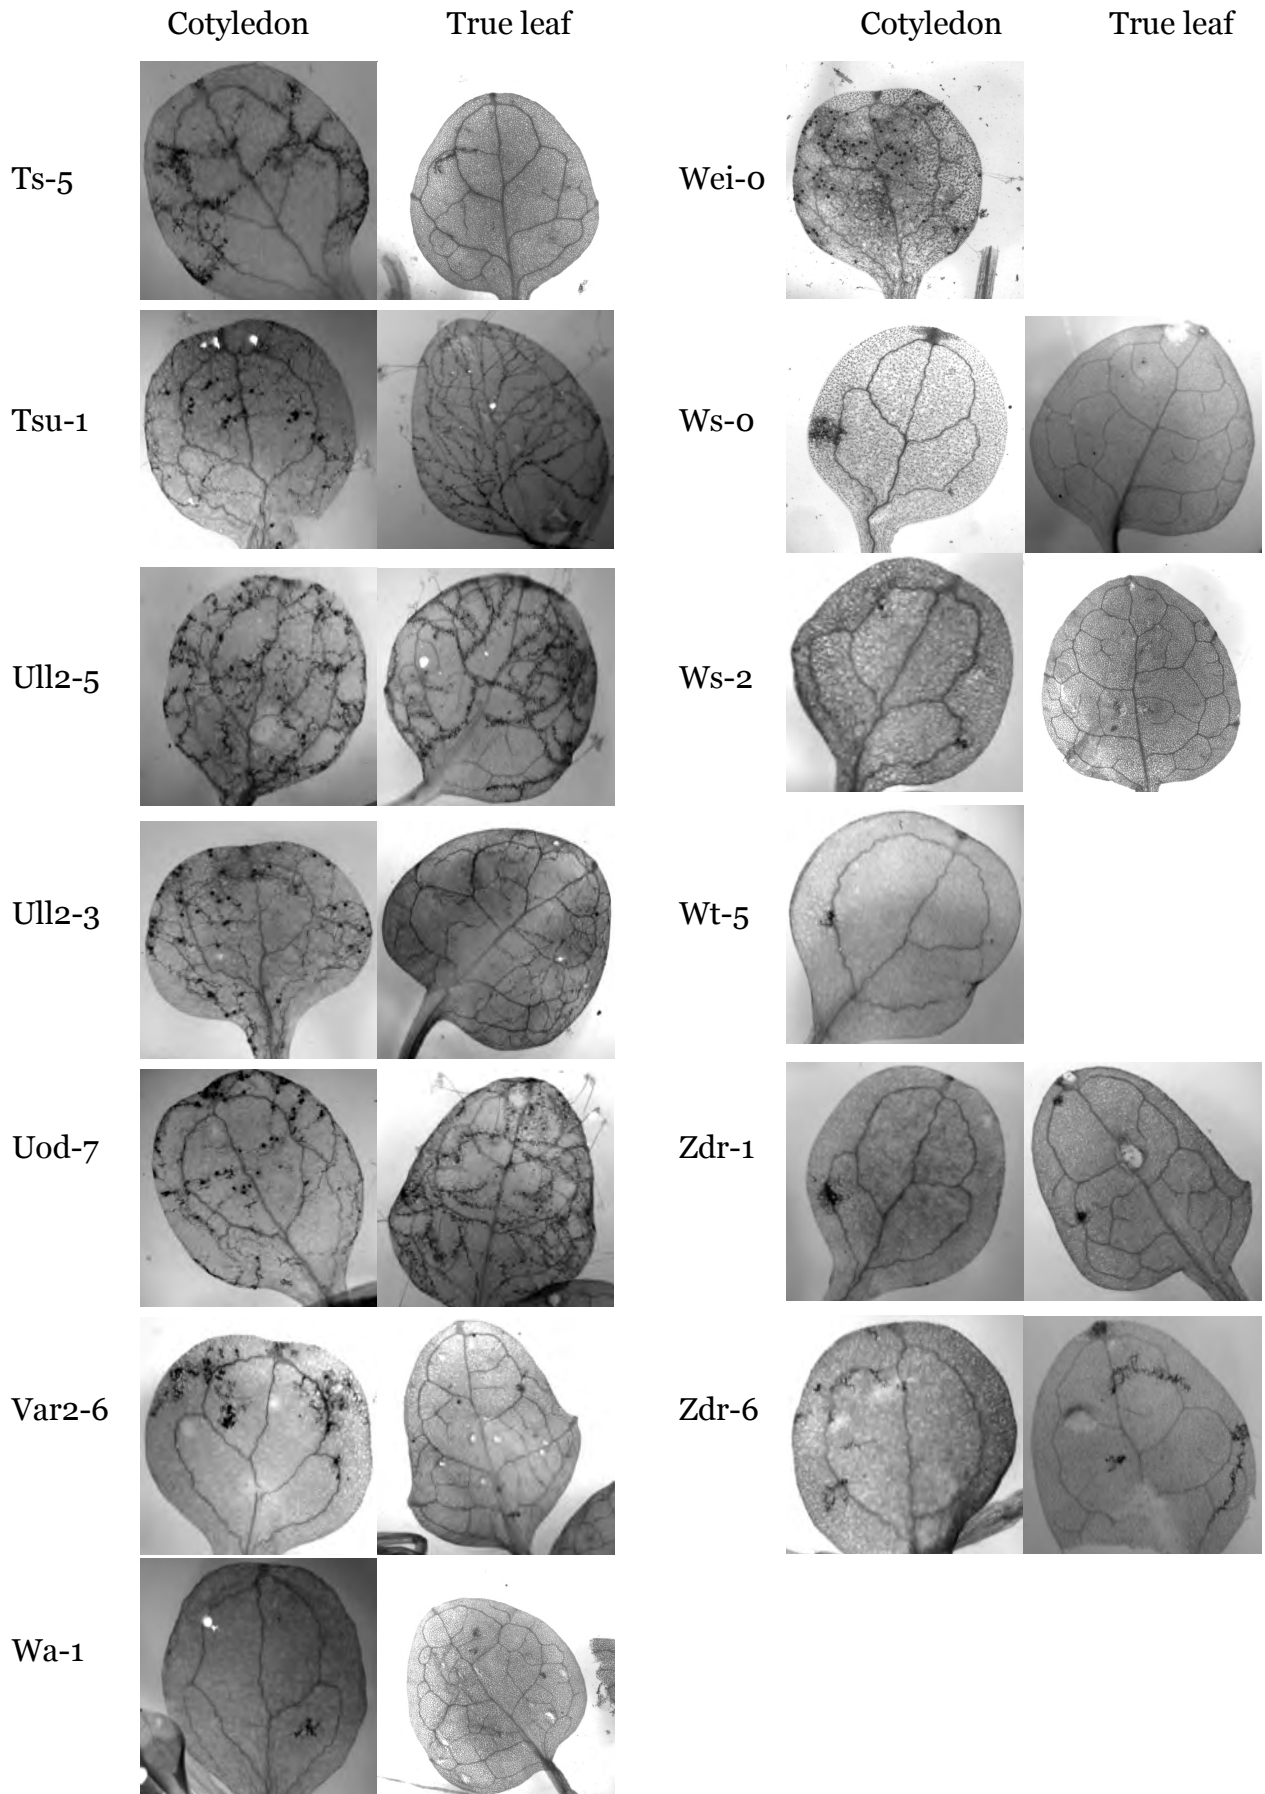

Supplement: pone.0028765.s005.pdf [file pone.0028765.s005.pdf]
