# Supplementary material for: Global Analysis of Arabidopsis/Downy Mildew Interactions Reveals Prevalence of Incomplete Resistance and Rapid Evolution of Pathogen Recognition
Source: PubMed Central journal article supplement (PMC3237489; doi:10.1371/journal.pone.0028765), 2011-12-14

**Supplemental Dataset 3. *Hpa* Emco5**

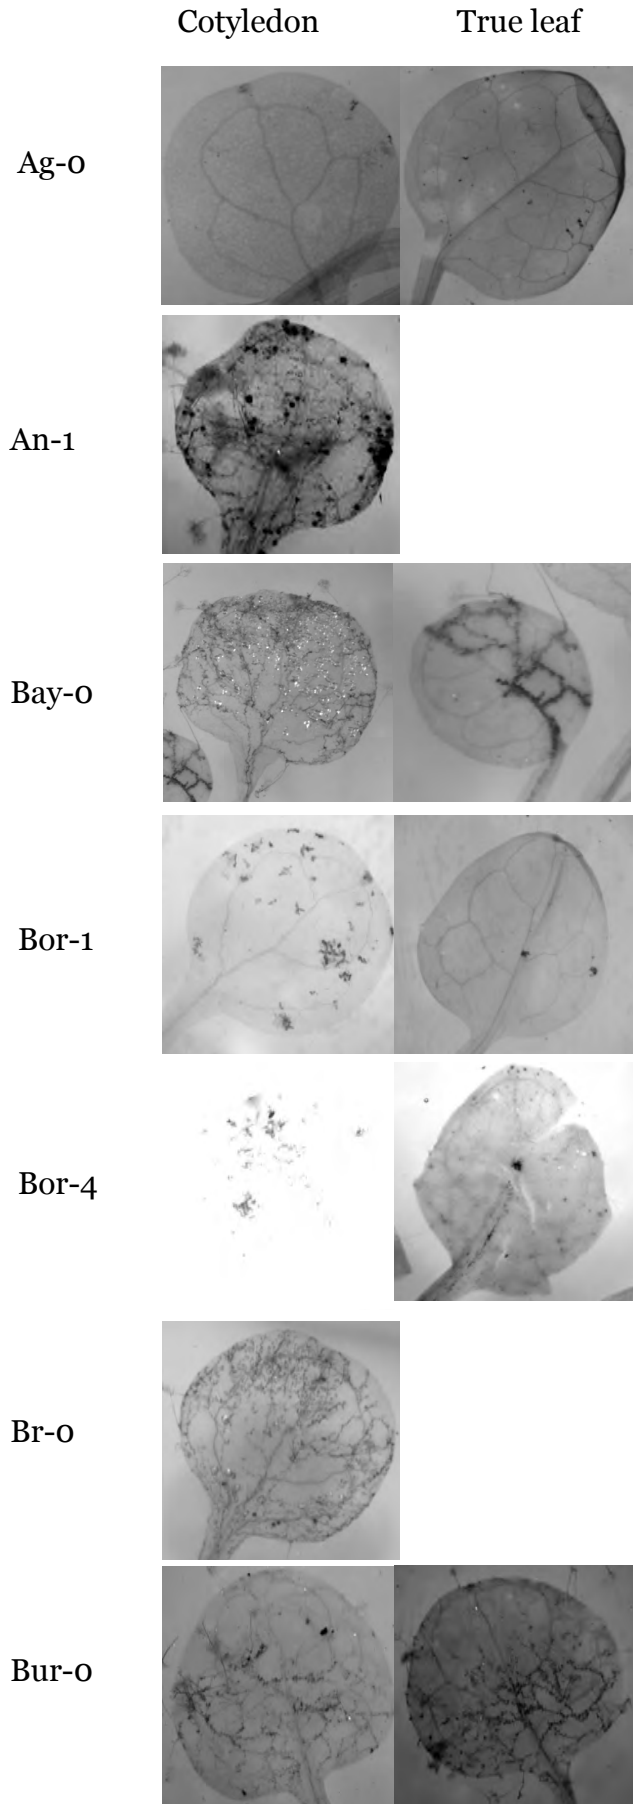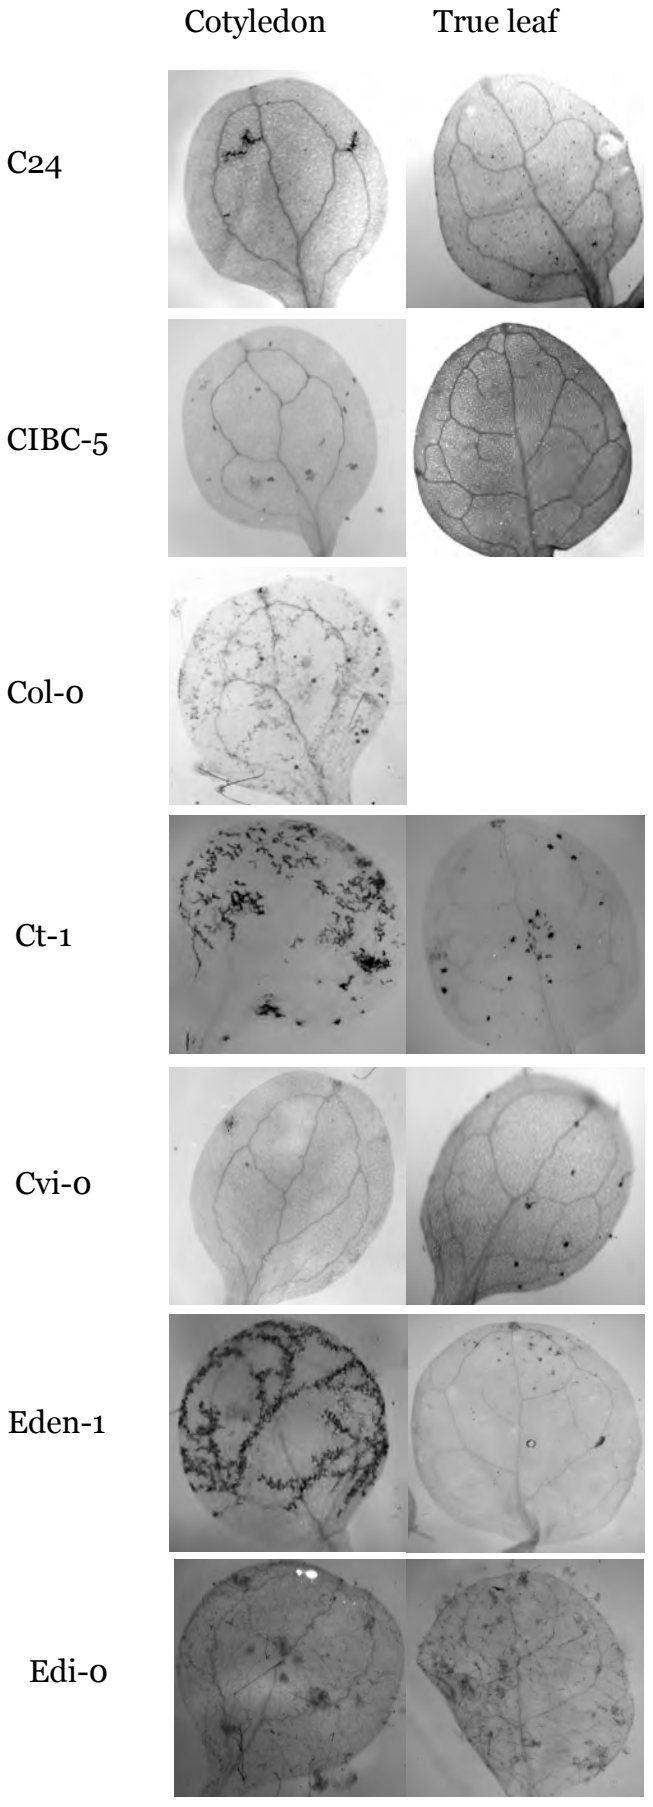

**Supplemental Dataset 3. *Hpa* Emco5**

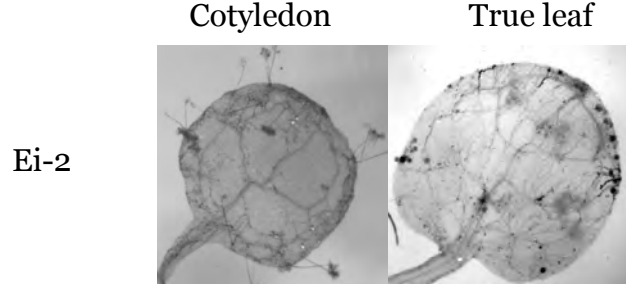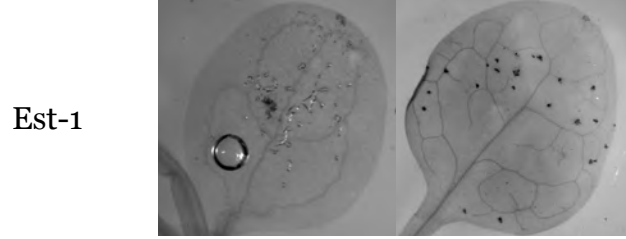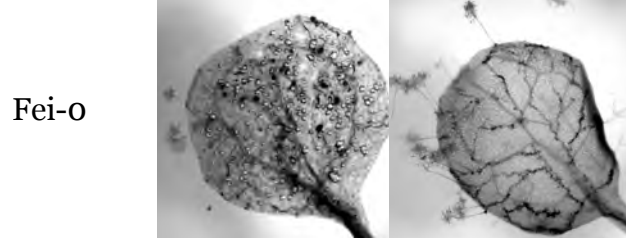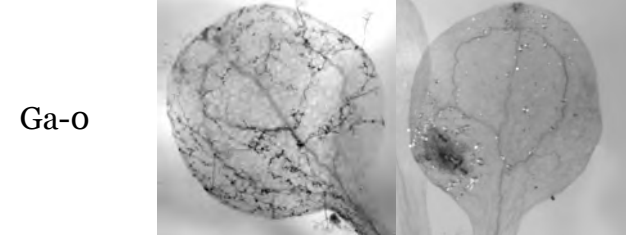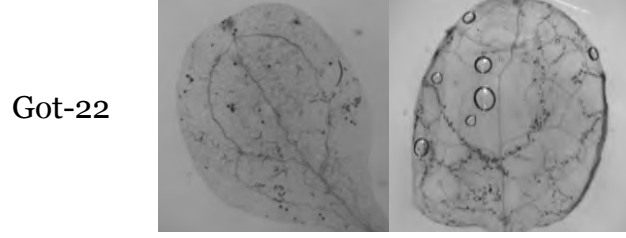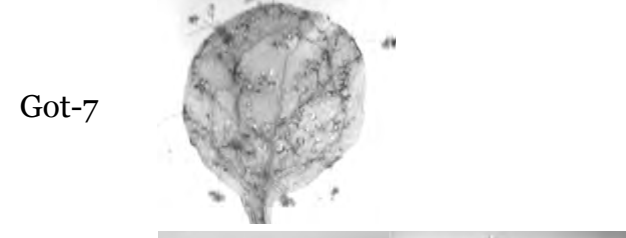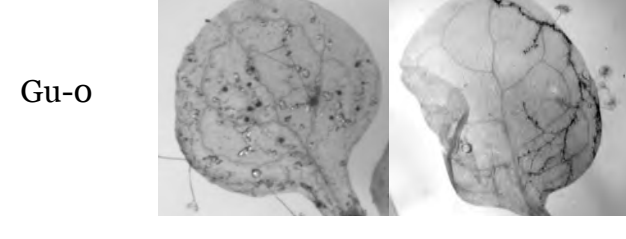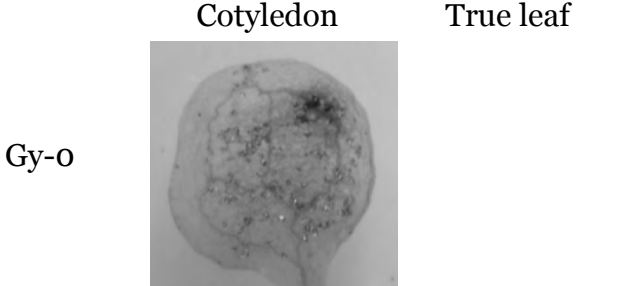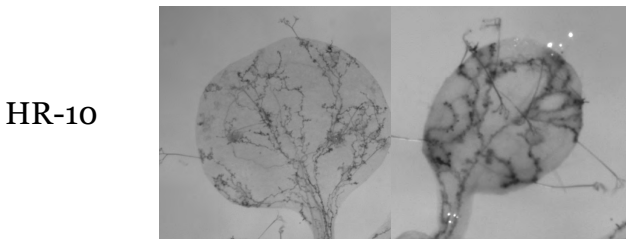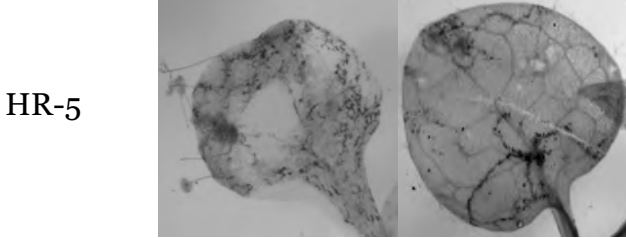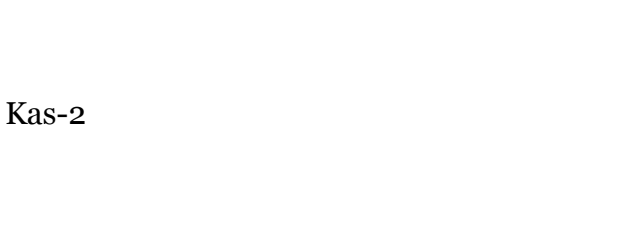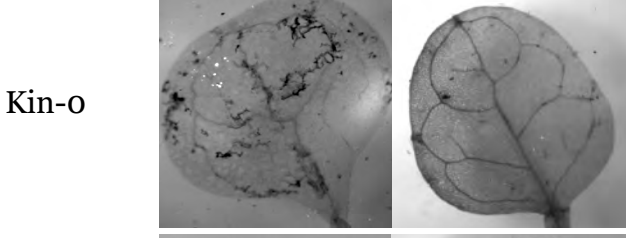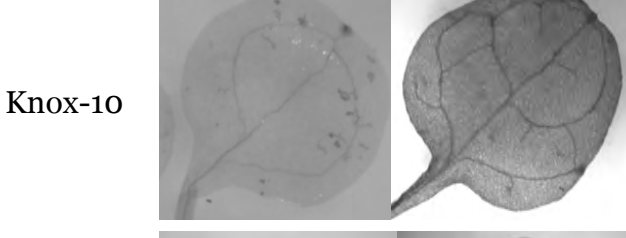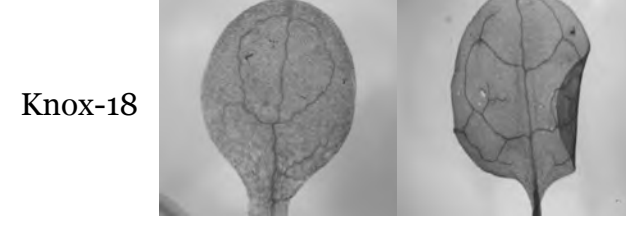

### Supplemental Dataset 3. *Hpa* Emco5

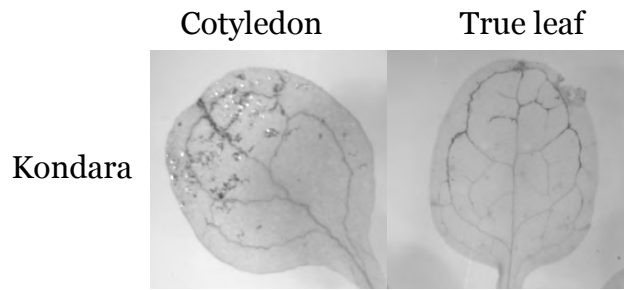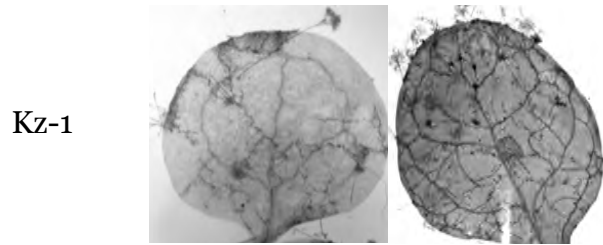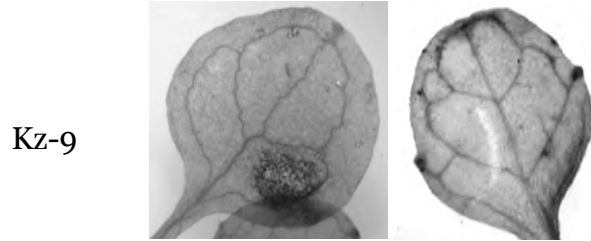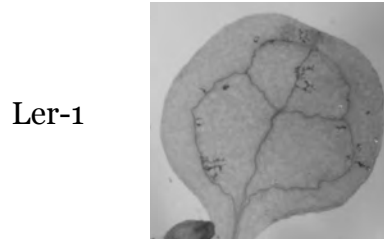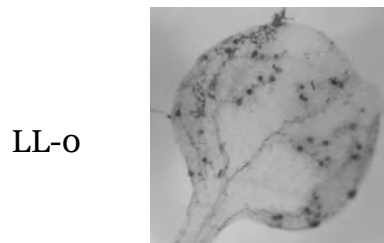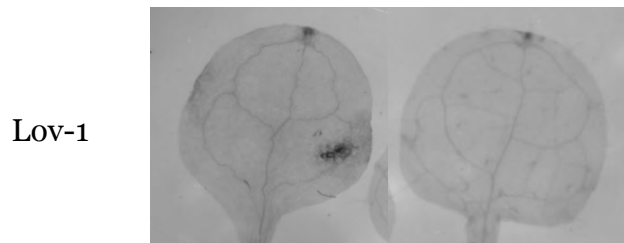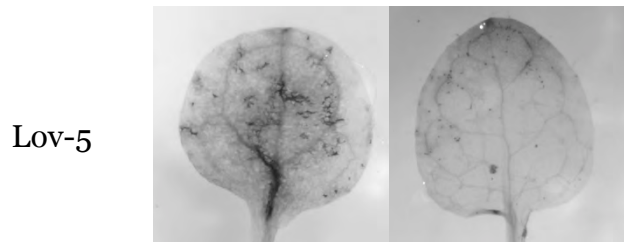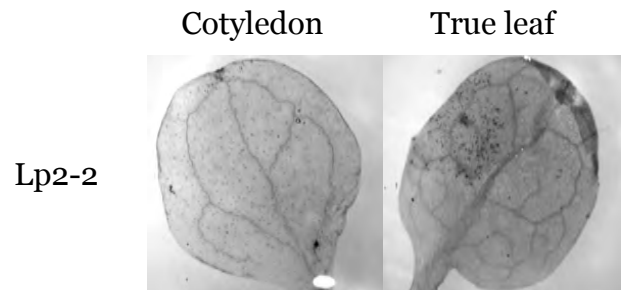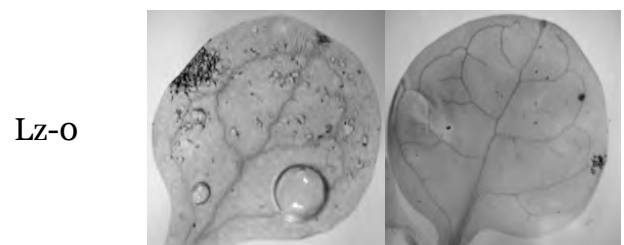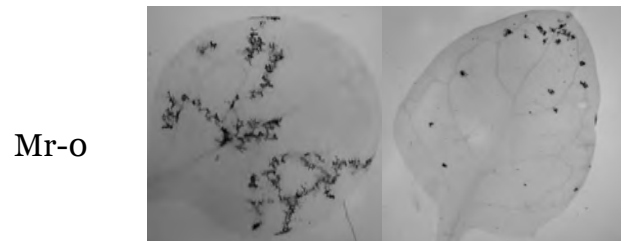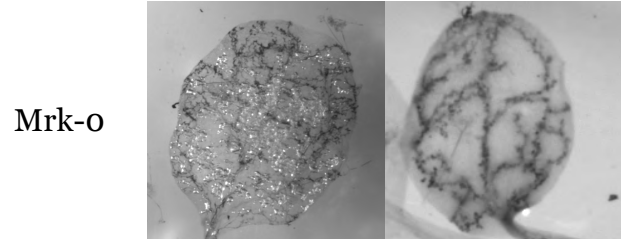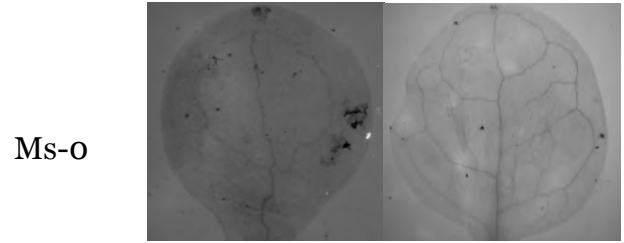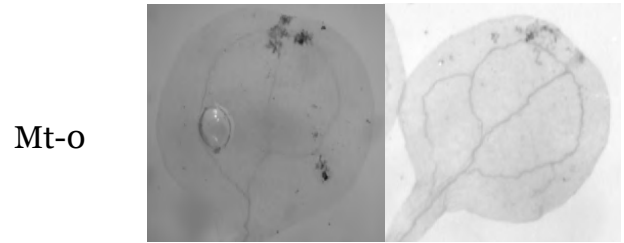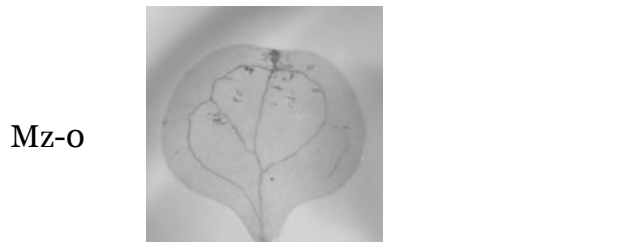

**Supplemental Dataset 3. *Hpa Emco5***

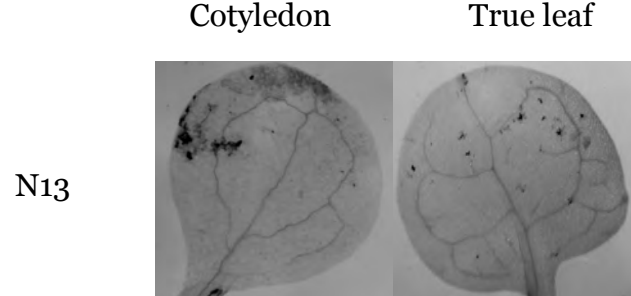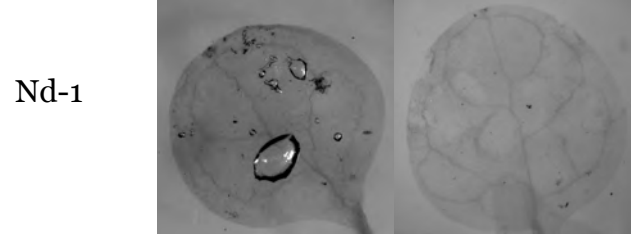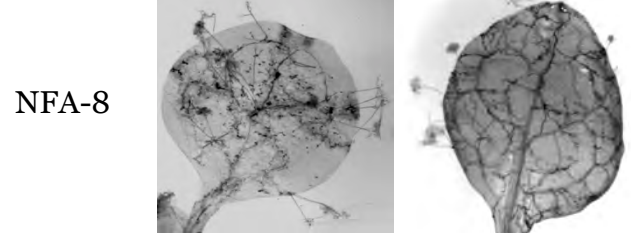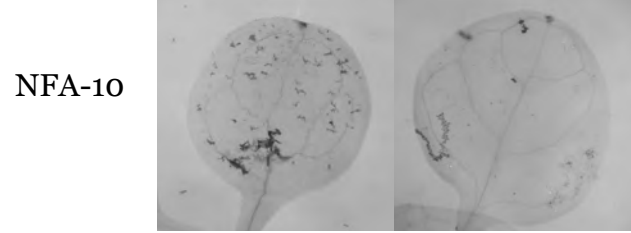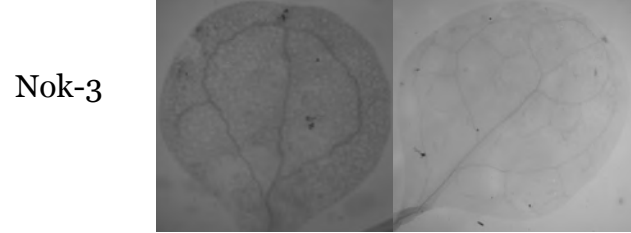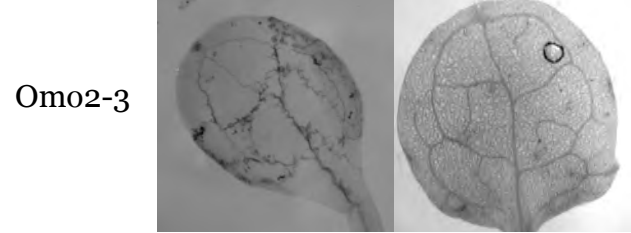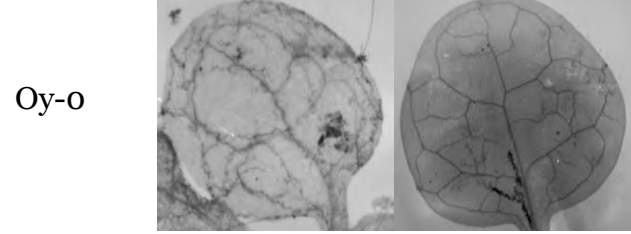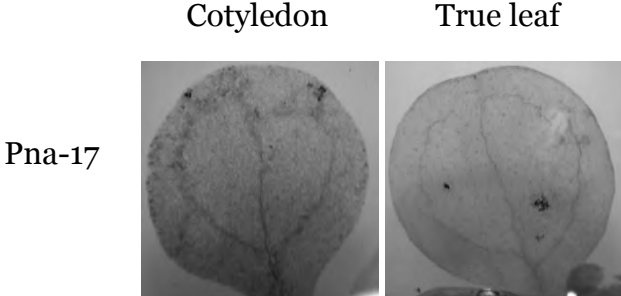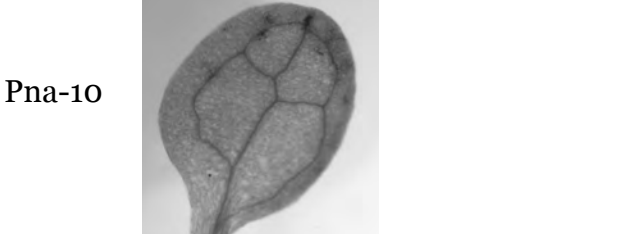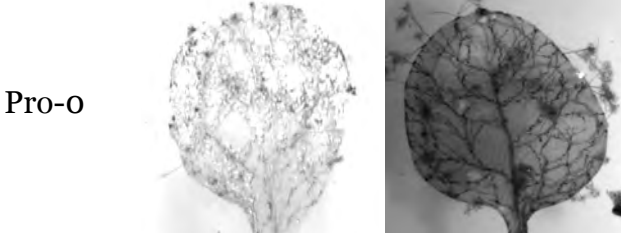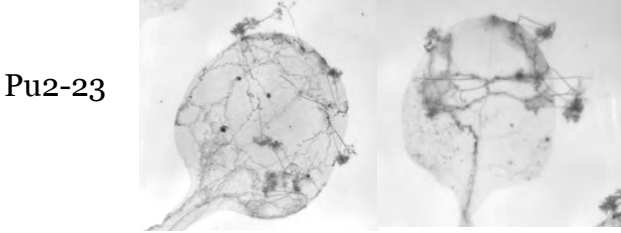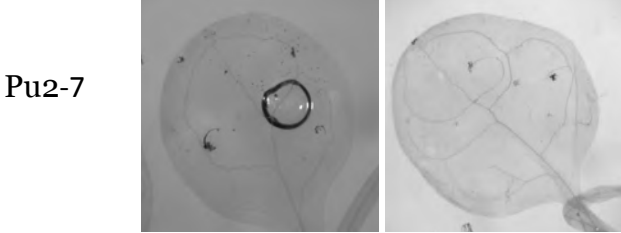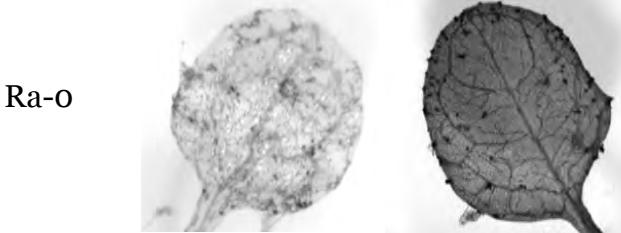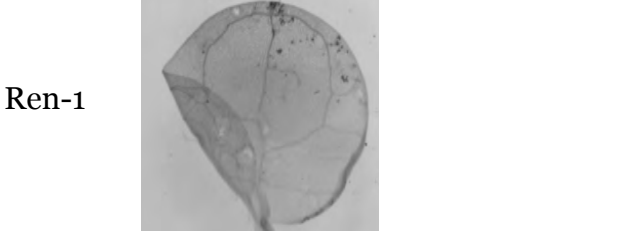

**Supplemental Dataset 3. *Hpa* Emco5**

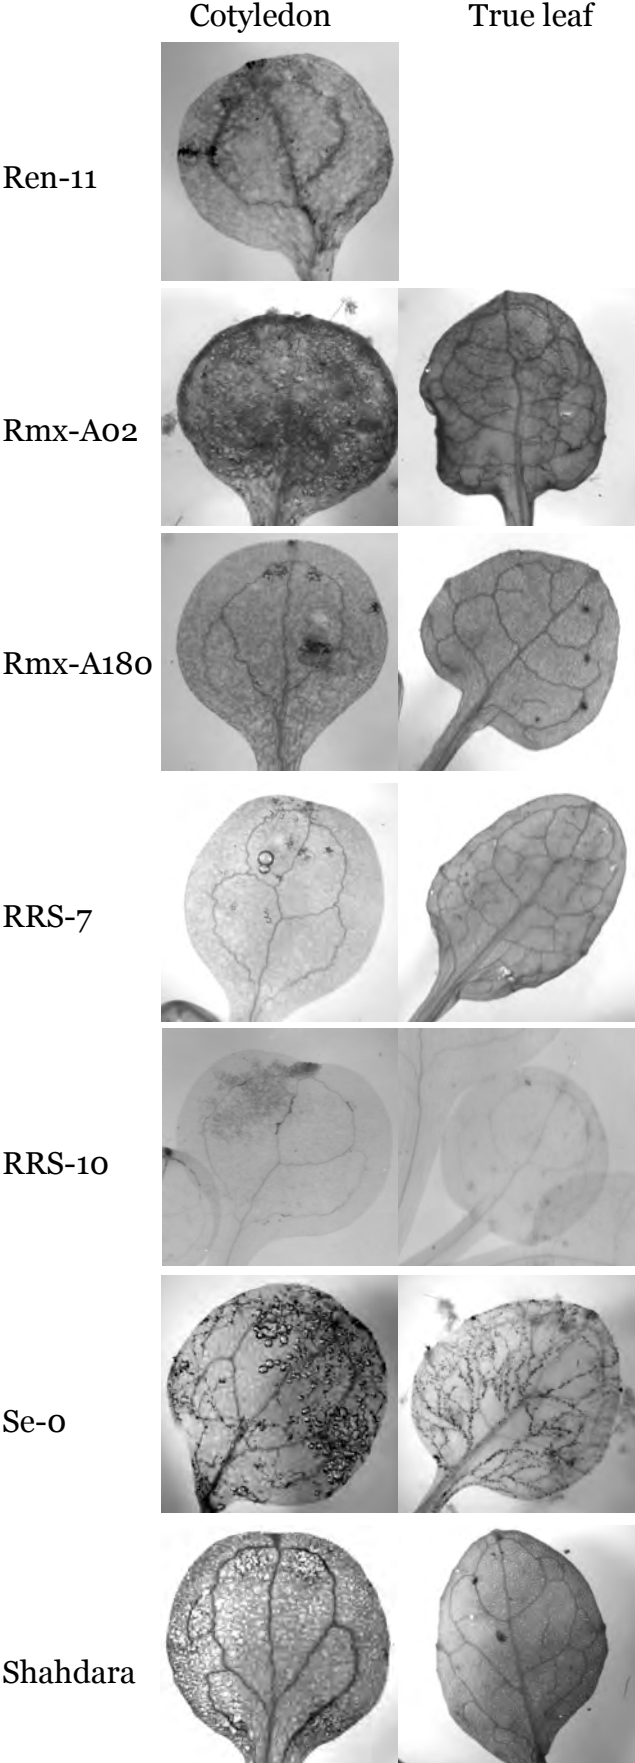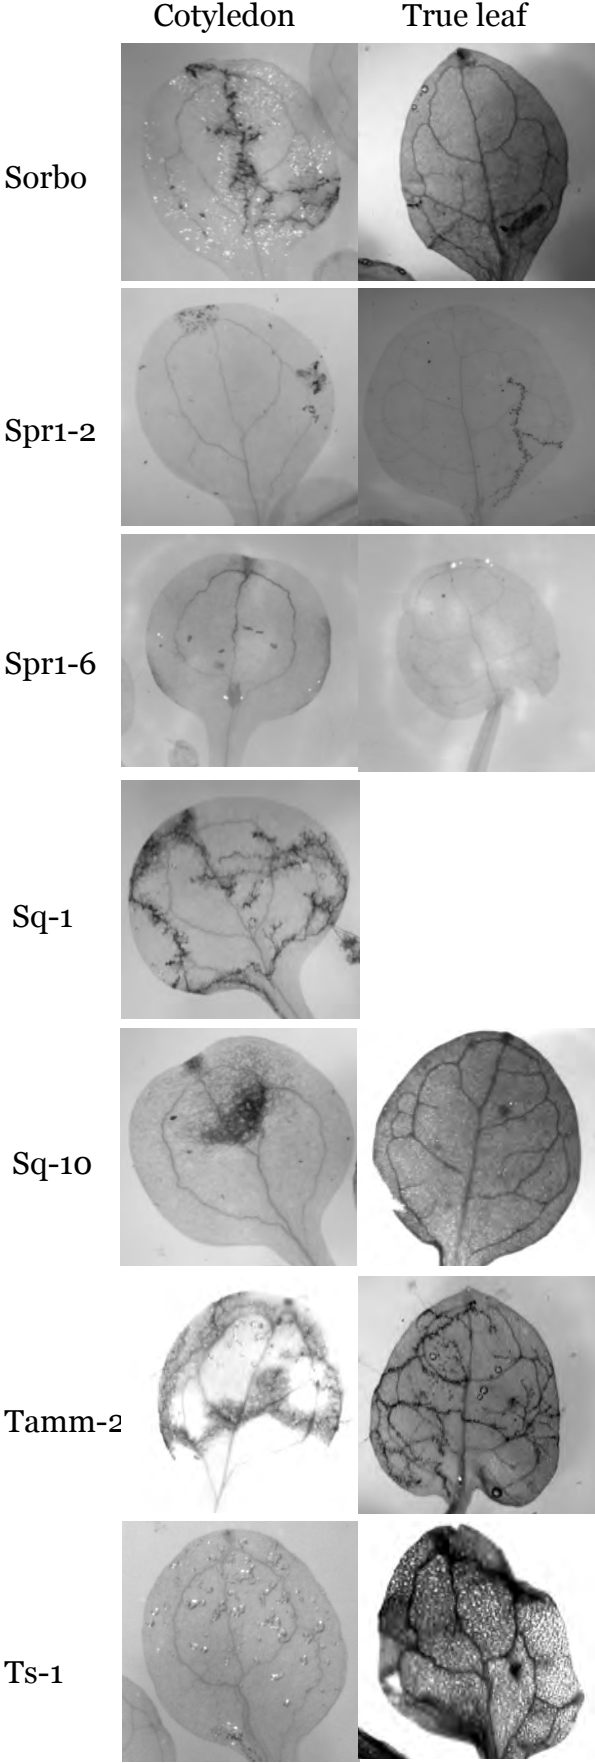

**Supplemental Dataset 3. *Hpa* Emco5**

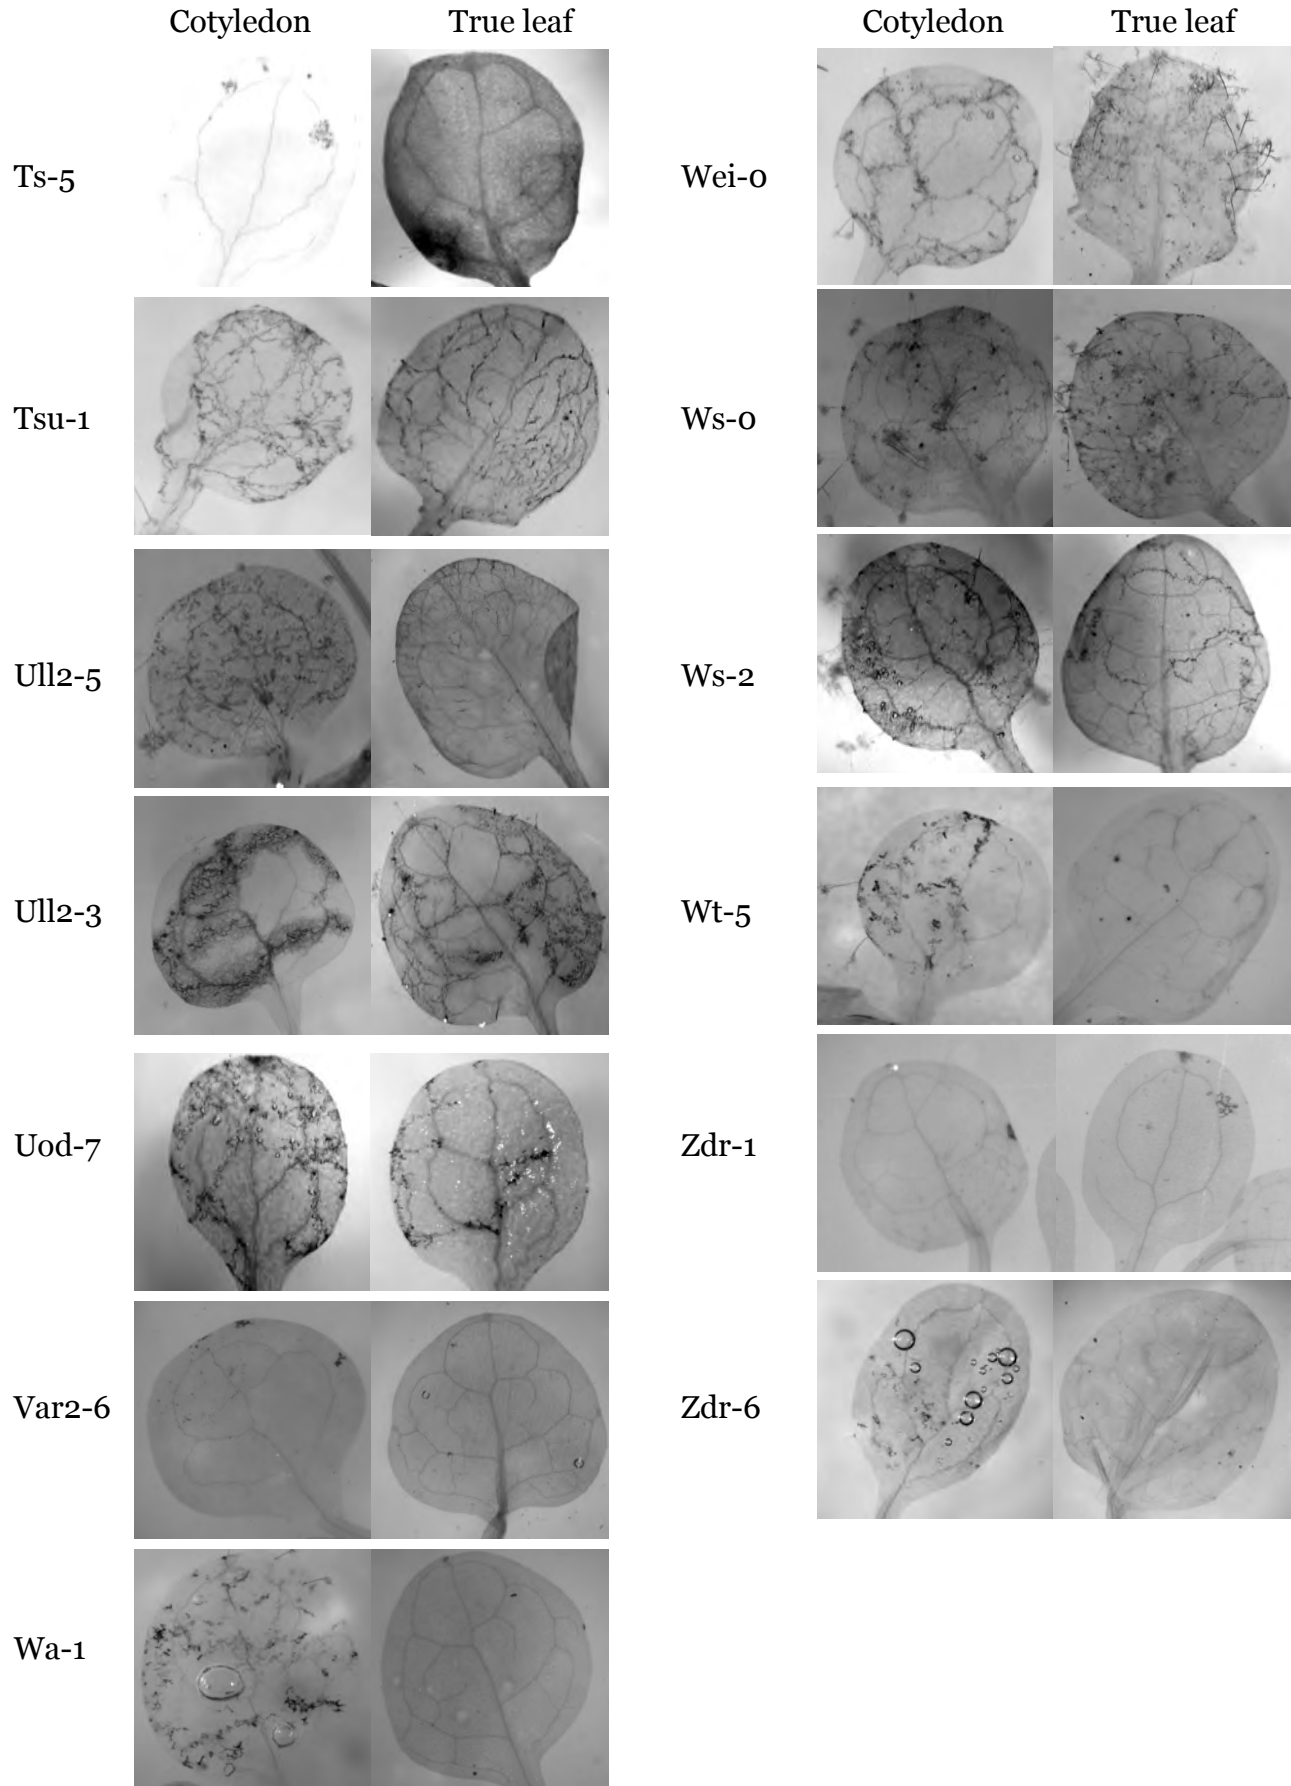

Supplement: pone.0028765.s006.pdf [file pone.0028765.s006.pdf]
