# Supplementary material for: Global Analysis of Arabidopsis/Downy Mildew Interactions Reveals Prevalence of Incomplete Resistance and Rapid Evolution of Pathogen Recognition
Source: PubMed Central journal article supplement (PMC3237489; doi:10.1371/journal.pone.0028765), 2011-12-14

# Supplemental Dataset 4. *Hpa* Cal2

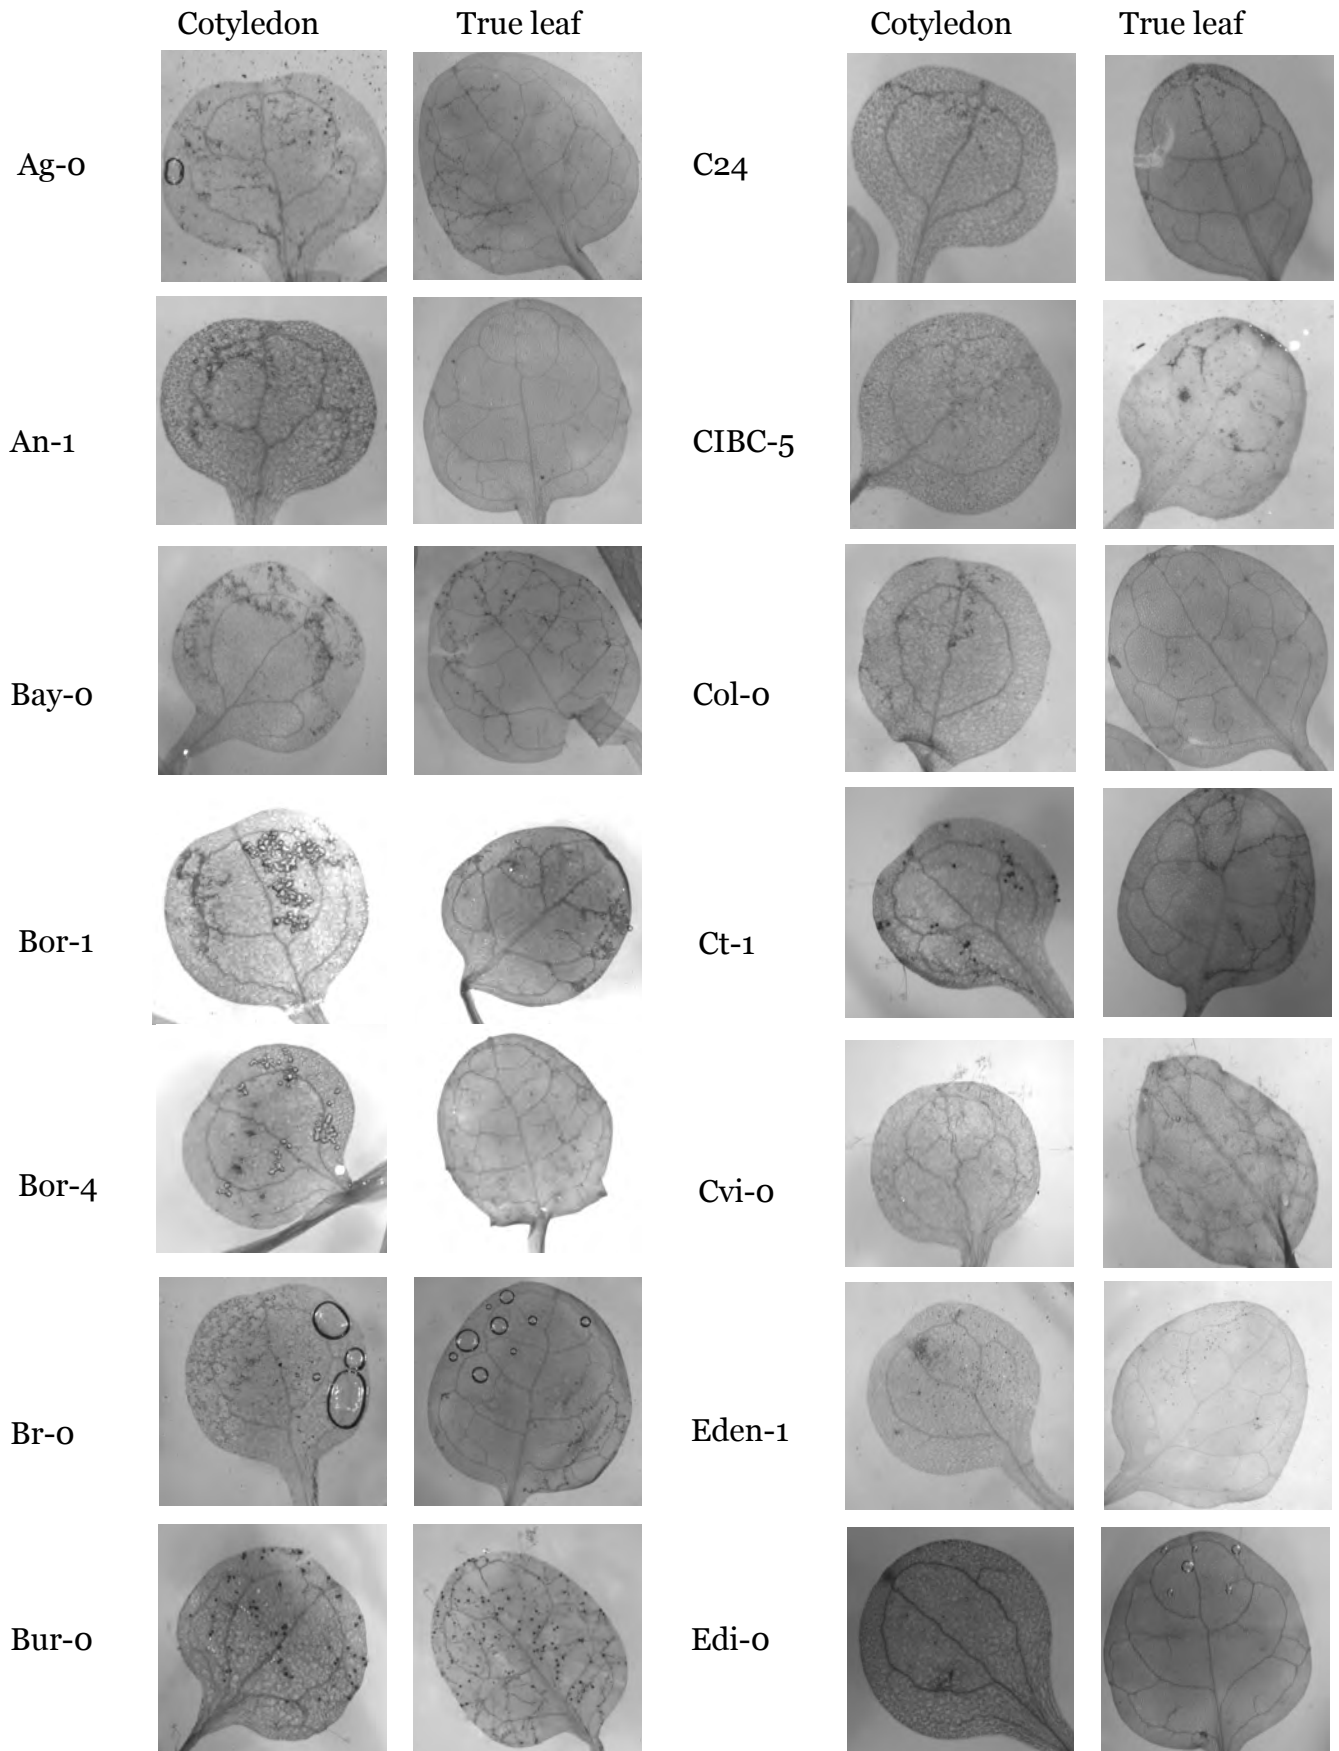

# Supplemental Dataset 4. *Hpa* Calaz

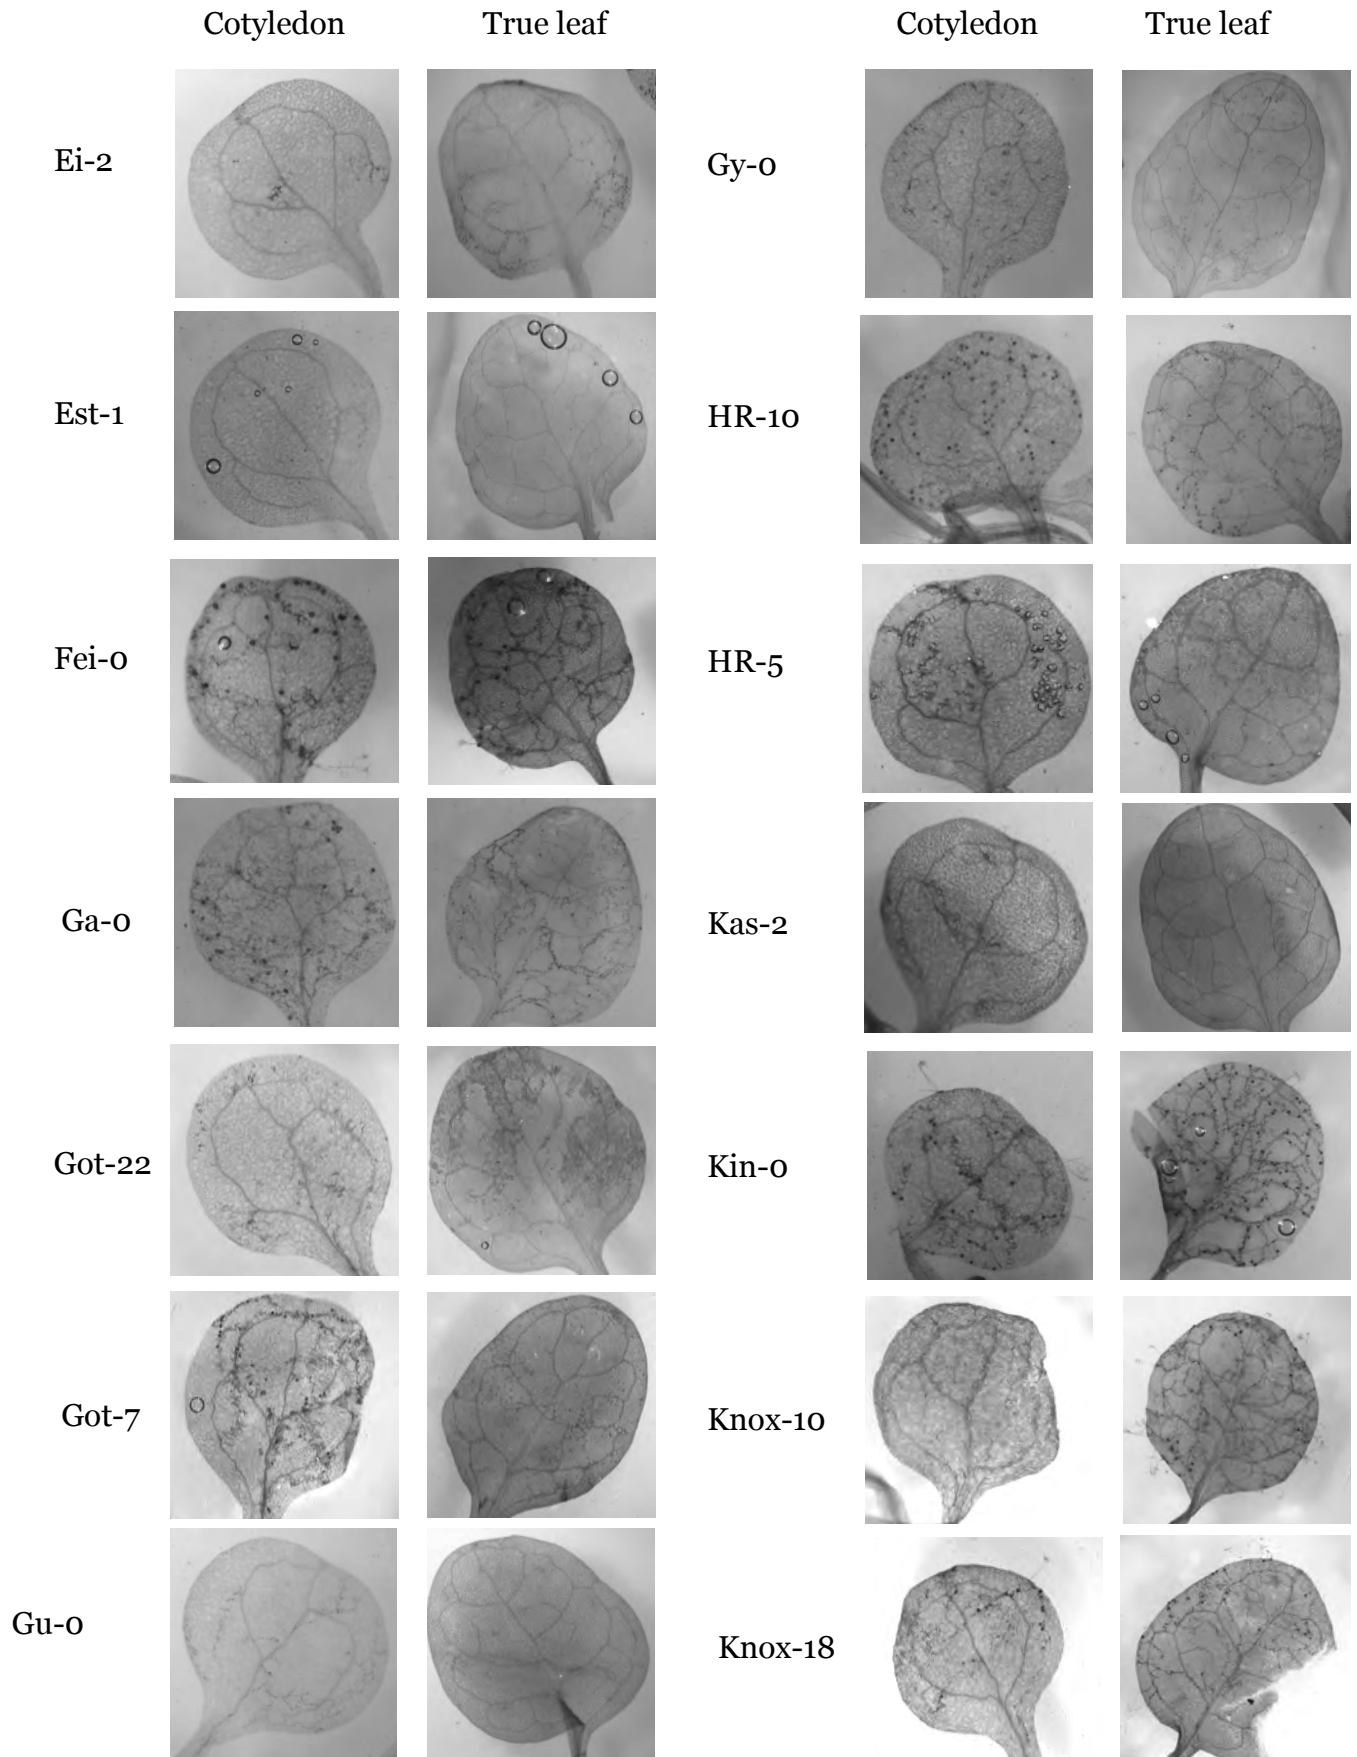

**Supplemental Dataset 4. *Hpa* Calaz**

|         | Cotyledon                                                                           | True leaf                                                                           |       | Cotyledon                                                                            | True leaf                                                                             |
|---------|-------------------------------------------------------------------------------------|-------------------------------------------------------------------------------------|-------|--------------------------------------------------------------------------------------|---------------------------------------------------------------------------------------|
| Kondara | 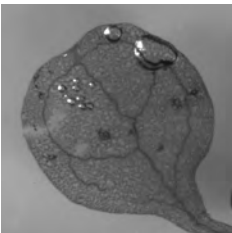   |    | Lp2-2 |    |    |
| Kz-1    |    |    | Lz-0  |    |    |
| Kz-9    |    |    | Mr-0  |    |    |
| Ler-1   |   |   | Mrk-0 |   |   |
| LL-0    |  |  | Ms-0  |  |  |
| Lov-1   |  |  | Mt-0  |  |  |
| Lov-5   |  |  | Mz-0  |  |  |

**Supplemental Dataset 4. *Hpa* Calaz**

|        | Cotyledon                                                                           | True leaf                                                                           |        | Cotyledon                                                                            | True leaf                                                                             |
|--------|-------------------------------------------------------------------------------------|-------------------------------------------------------------------------------------|--------|--------------------------------------------------------------------------------------|---------------------------------------------------------------------------------------|
| N13    | 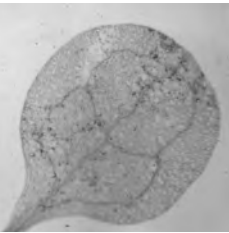   |    | Pna-17 |    |    |
| Nd-1   |    |    | Pna-10 |    |    |
| NFA-8  |    |    | Pro-0  |    |    |
| NFA-10 |  |  | Pu2-23 |  |  |
| Nok-3  |  |  | Pu2-7  |  |  |
| Omo2-3 |  |  | Ra-0   |  |  |
| Oy-0   |  |  | Ren-1  |  |  |

# Supplemental Dataset 4. *Hpa* Calaz

|          | Cotyledon                                                                           | True leaf                                                                           |        | Cotyledon                                                                             | True leaf                                                                             |
|----------|-------------------------------------------------------------------------------------|-------------------------------------------------------------------------------------|--------|---------------------------------------------------------------------------------------|---------------------------------------------------------------------------------------|
| Ren-11   | 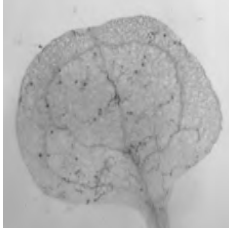   |    | Sorbo  |    |    |
| Rmx-A02  |    |    | Spr1-2 |    |    |
| Rmx-A180 |    |    | Spr1-6 |    |    |
| RRS-7    |   |   | Sq-1   |   |   |
| RRS-10   |  |  | Sq-10  |  |  |
| Se-0     |  |  | Tamm-2 |  |  |
| Shahdara |  |  | Ts-1   |  |  |

**Supplemental Dataset 4. *Hpa* Cala2**

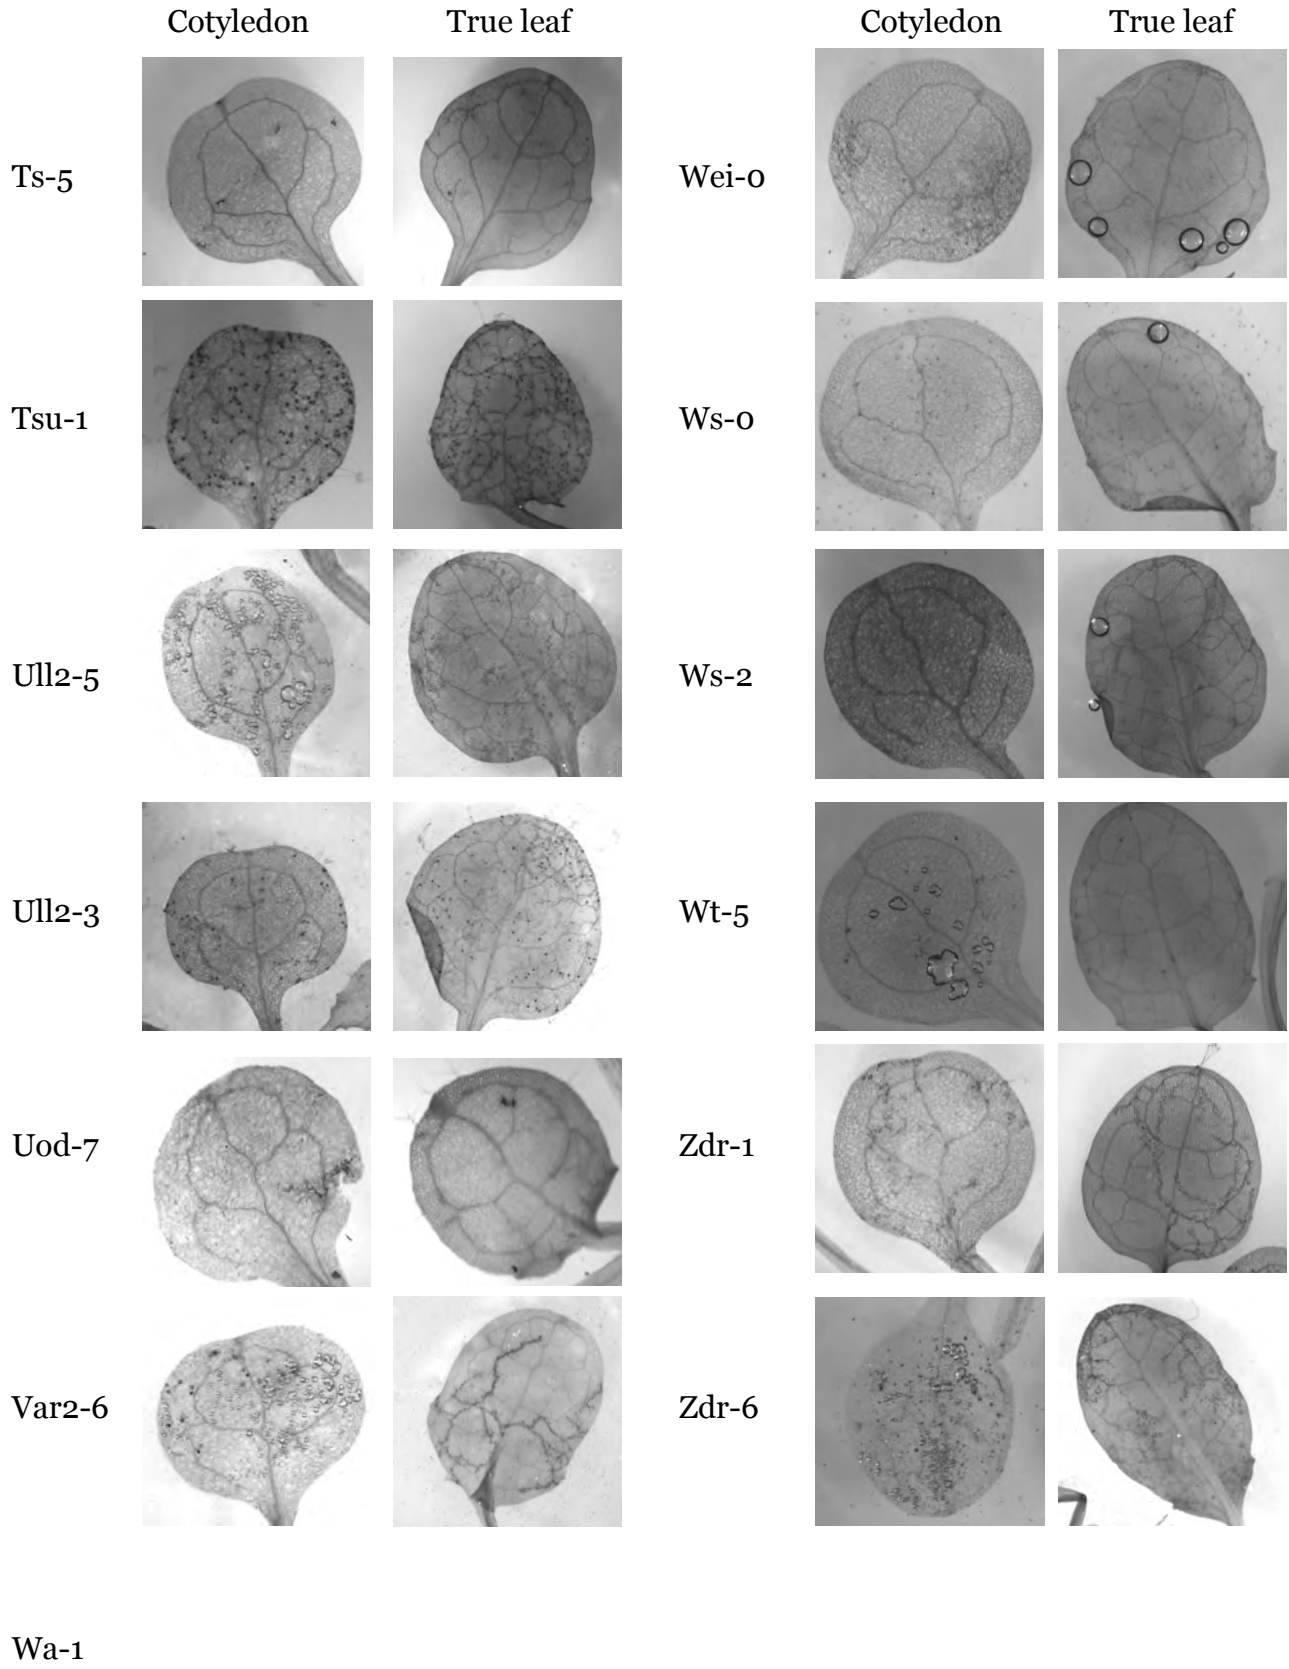

Supplement: pone.0028765.s007.pdf [file pone.0028765.s007.pdf]
